# Supplementary material for: Urinary peptidomics and bioinformatics for the detection of diabetic kidney disease
Source: PubMed Central journal article supplement (PMC6985249; doi:10.1038/s41598-020-58067-7), 2020-01-27

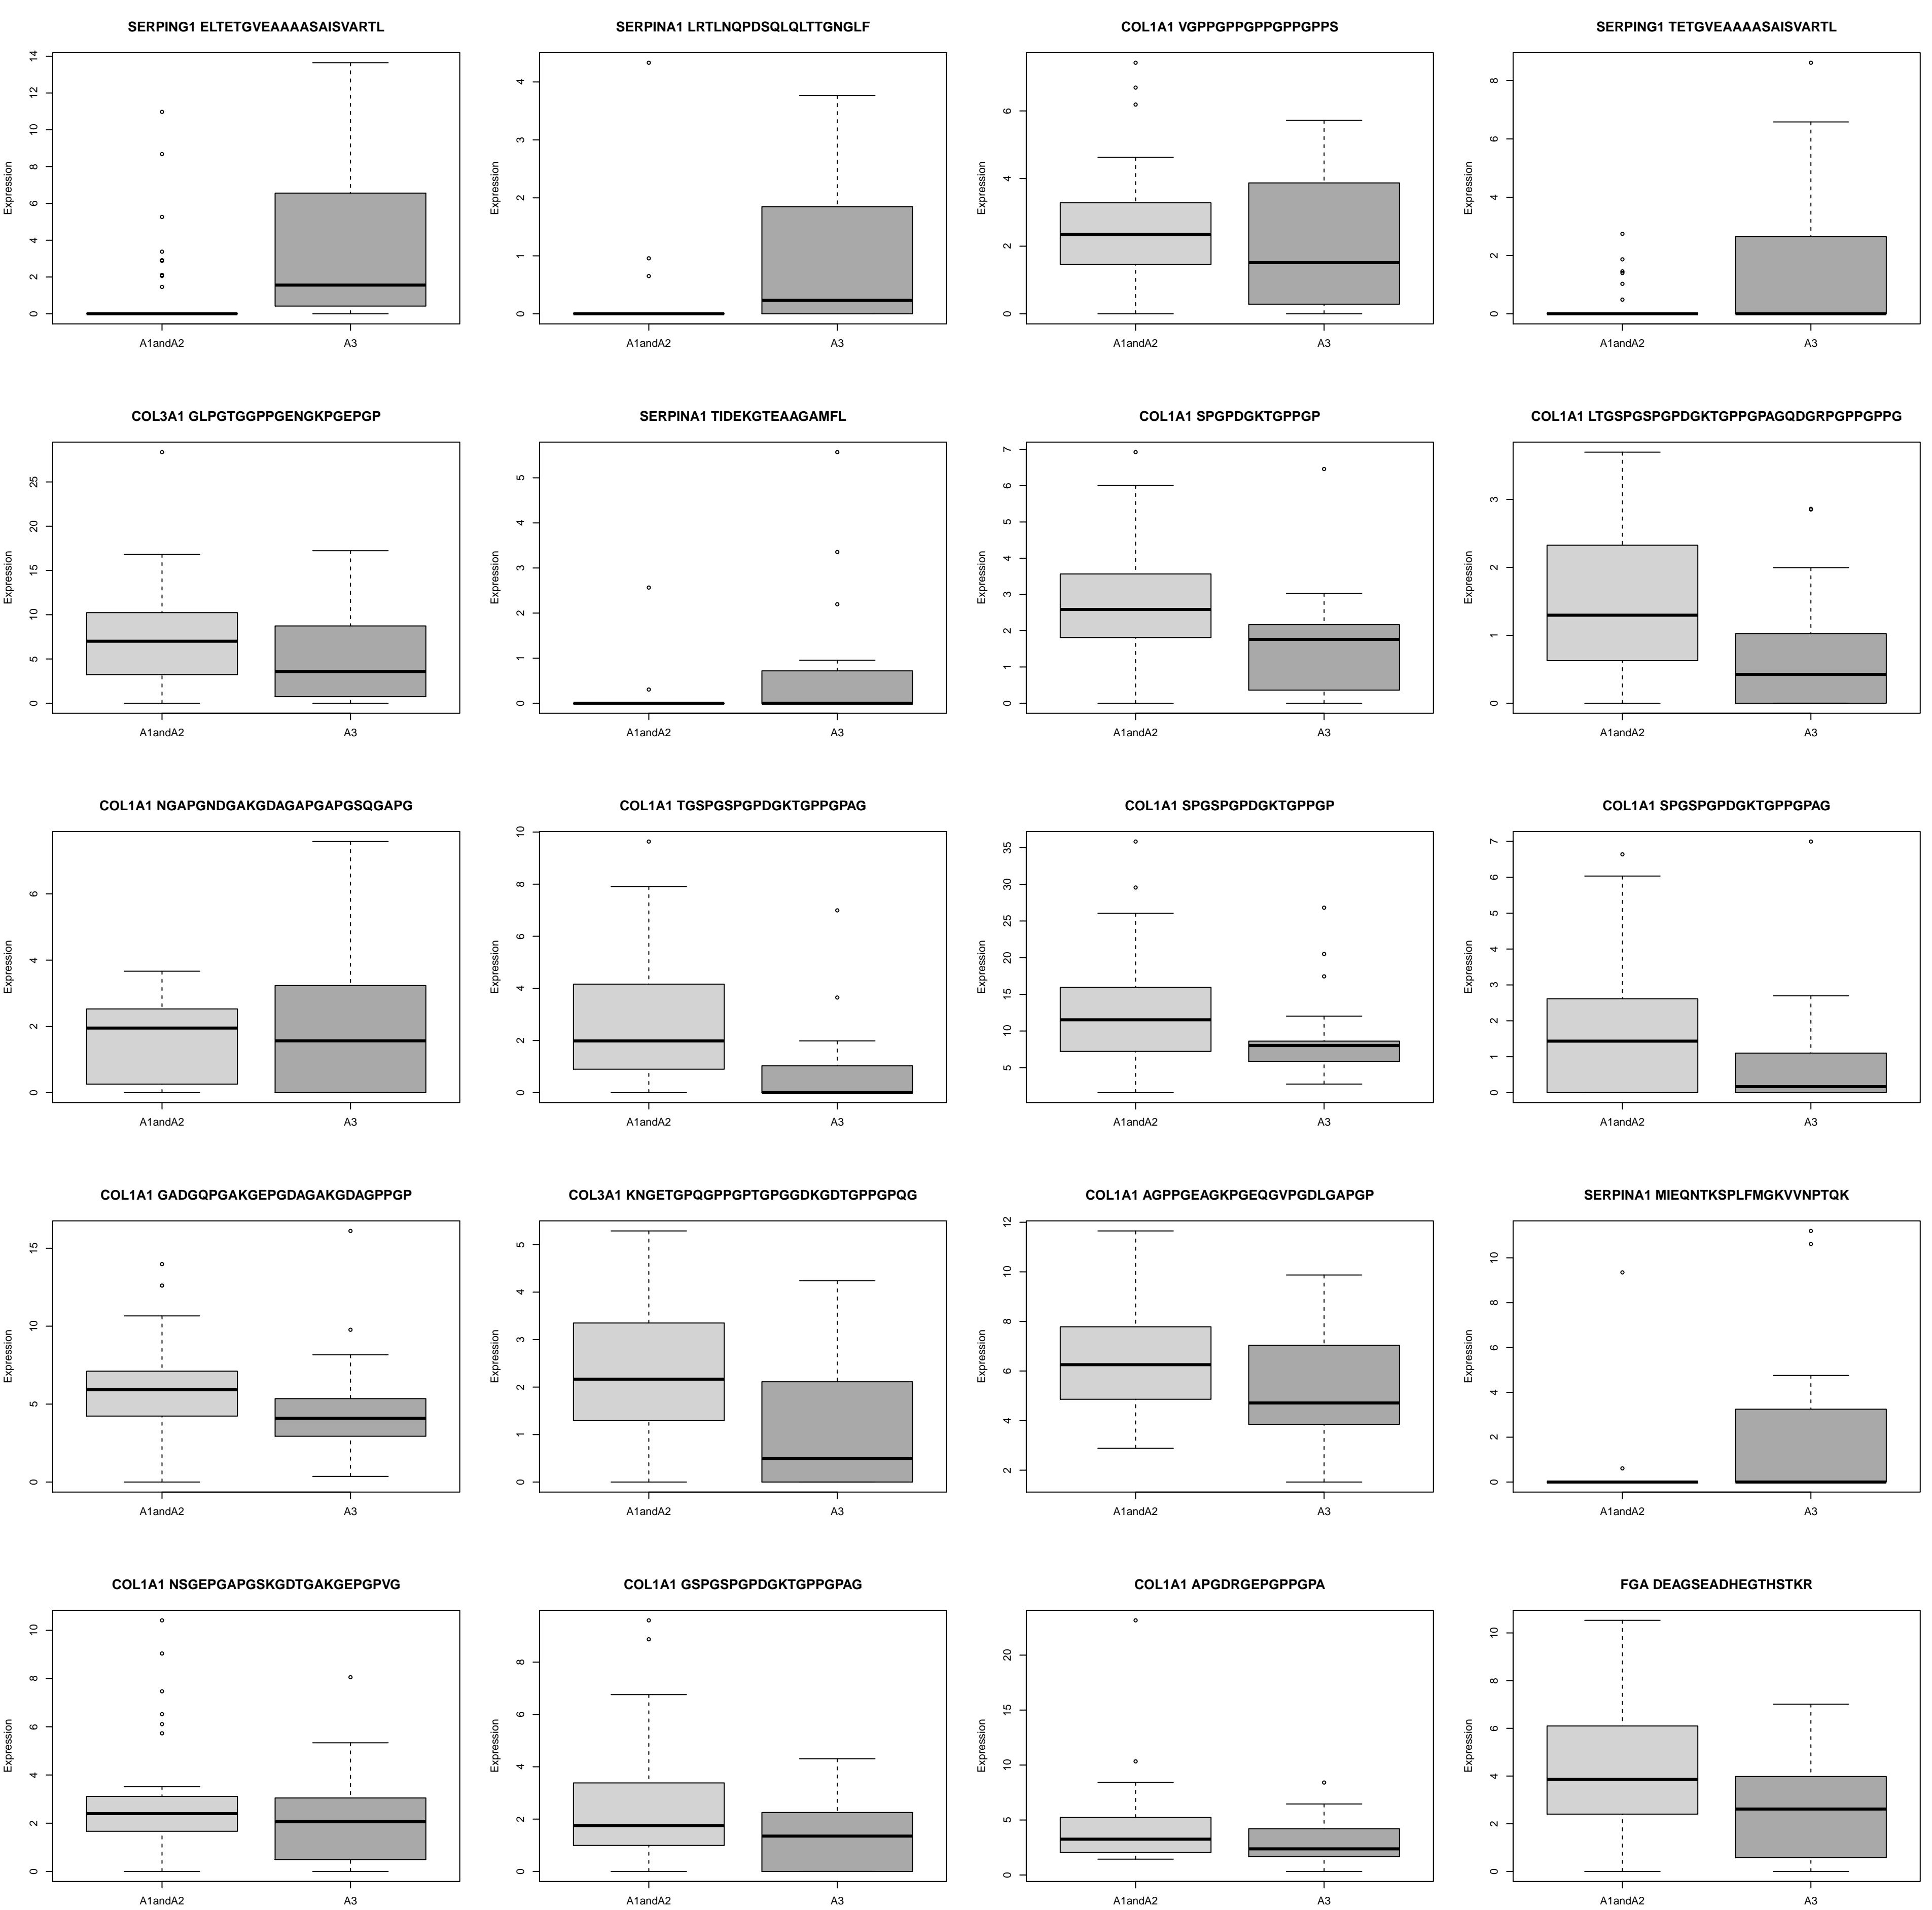

**COL1A1 VGPPGPPGPPGPPGPPSAG**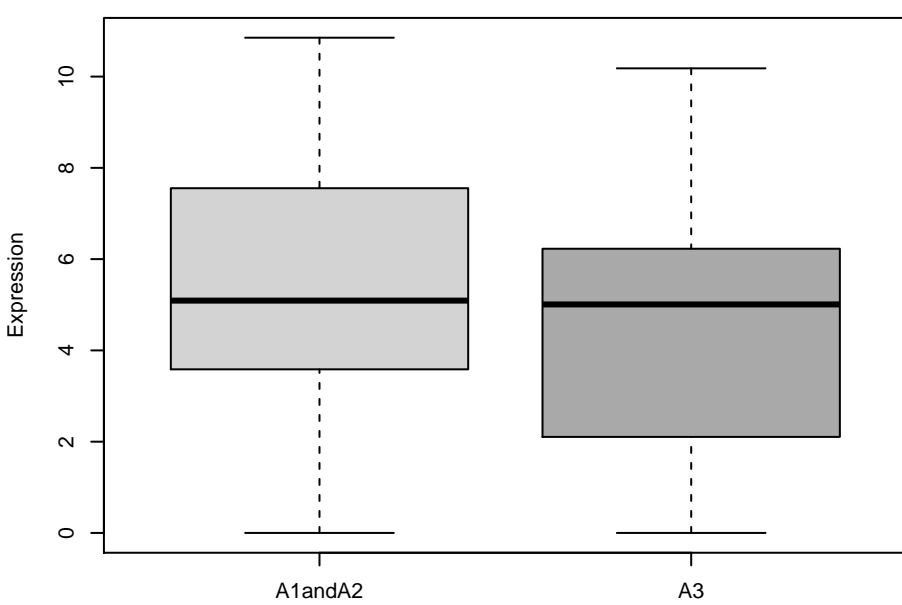**SERPINA1 EAIPMSIPPEVKFNKPF**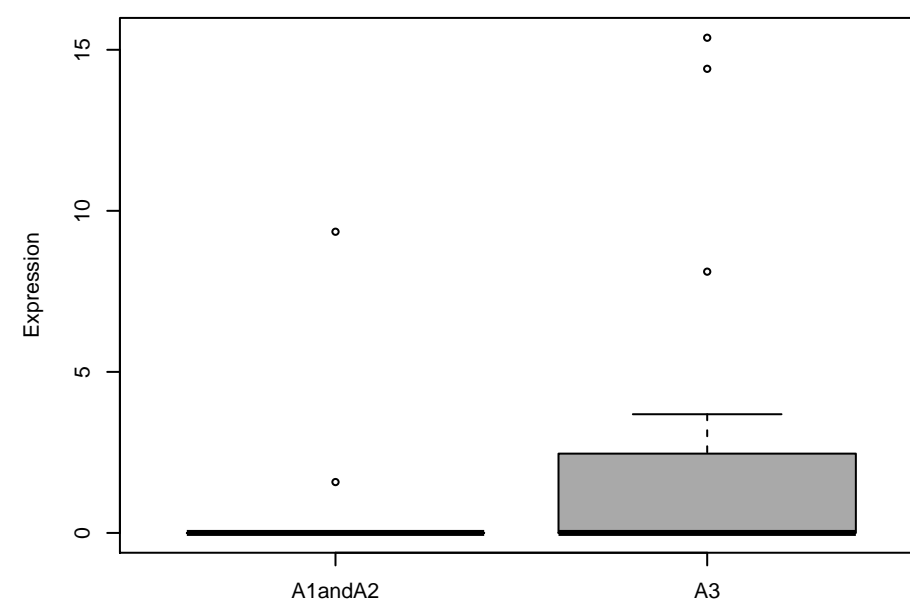**COL3A1 DAGAPGAPGGKGDAGAPGERGPPG**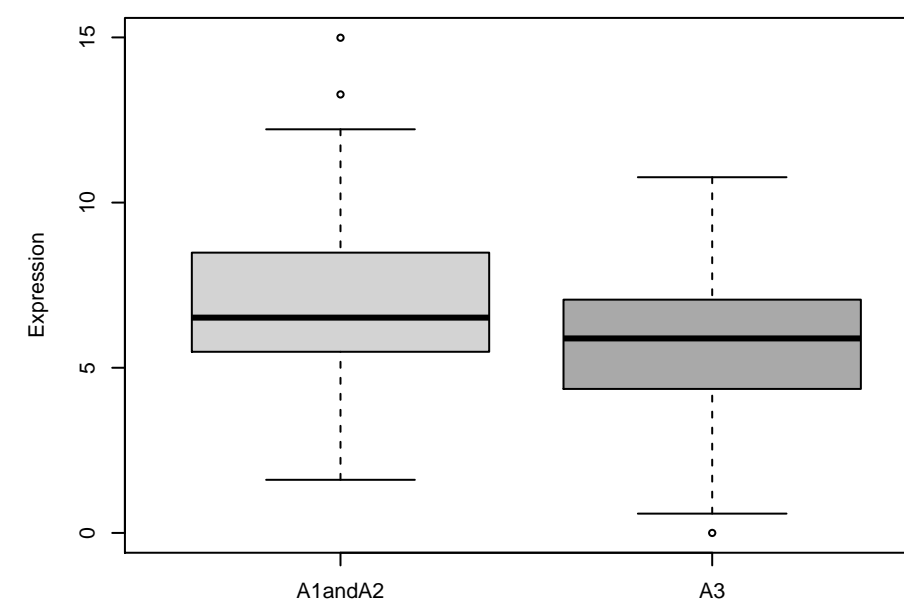**COL3A1 ERGEAGIPGVGAKGEDGKDGSPGEGANG**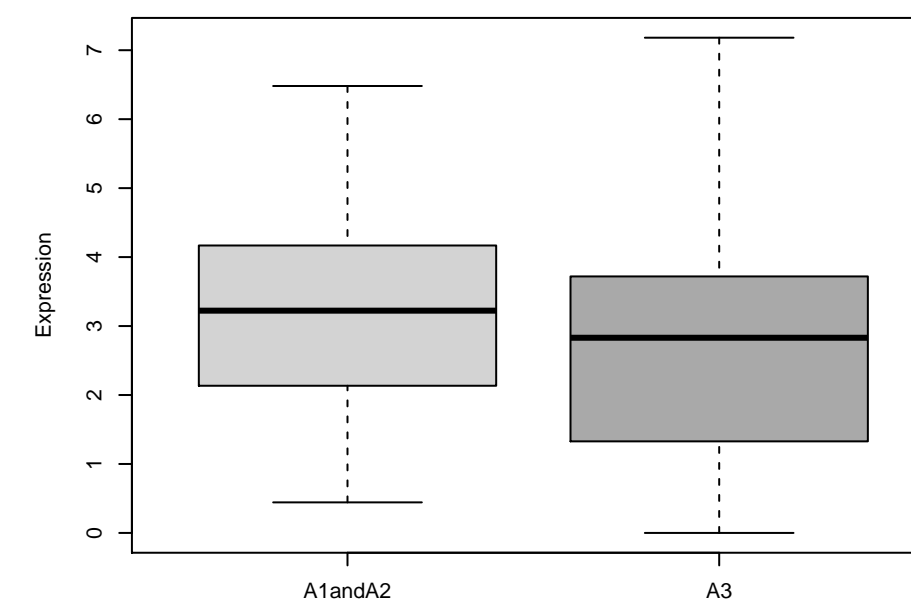**SERPINA1 EAIPMSIPPEVKFNKPFV**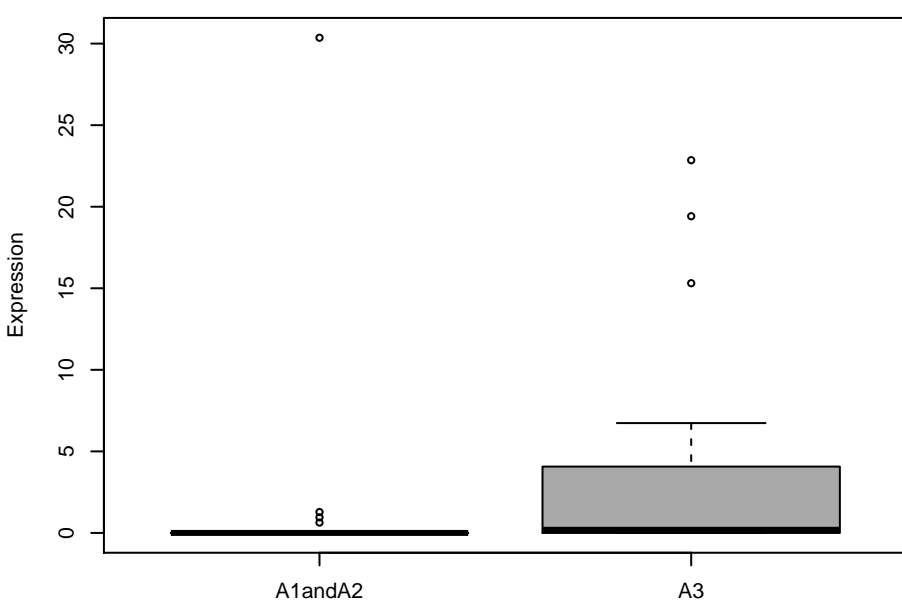**INS EAEDLQVGQVELGGGPGAGSLQPLALEGLSQ**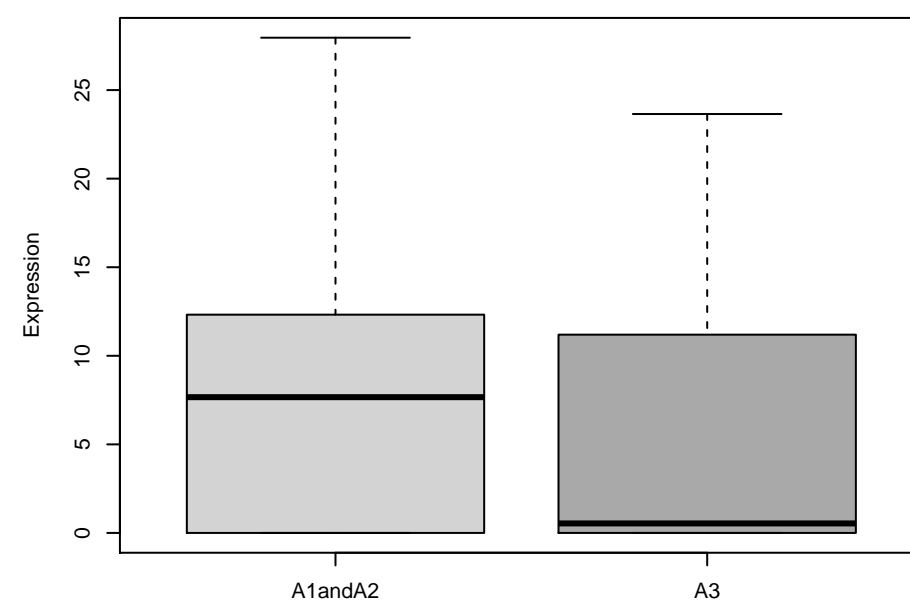**UMOD VIDQSRVNLNGPIT**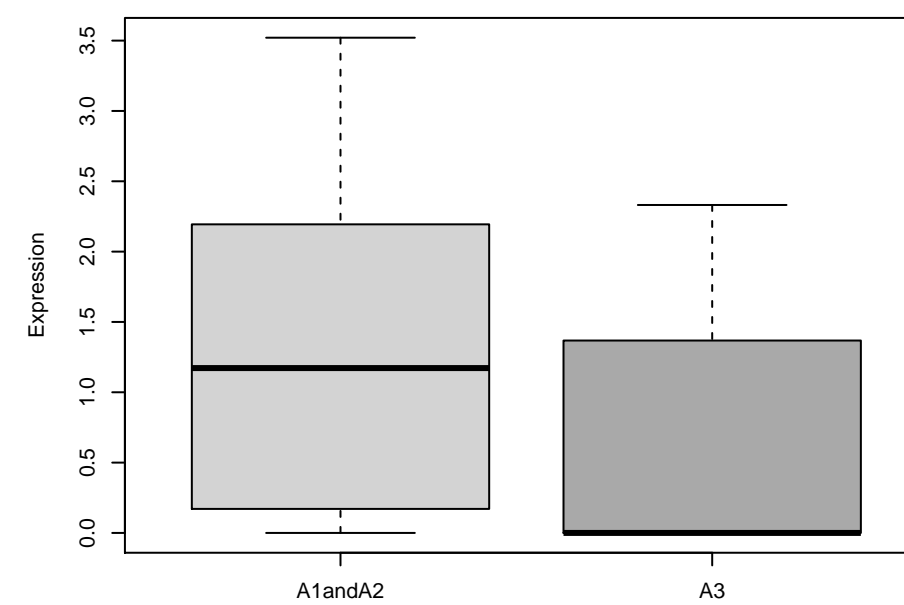**COL1A1 APGDRGEPGPPGP**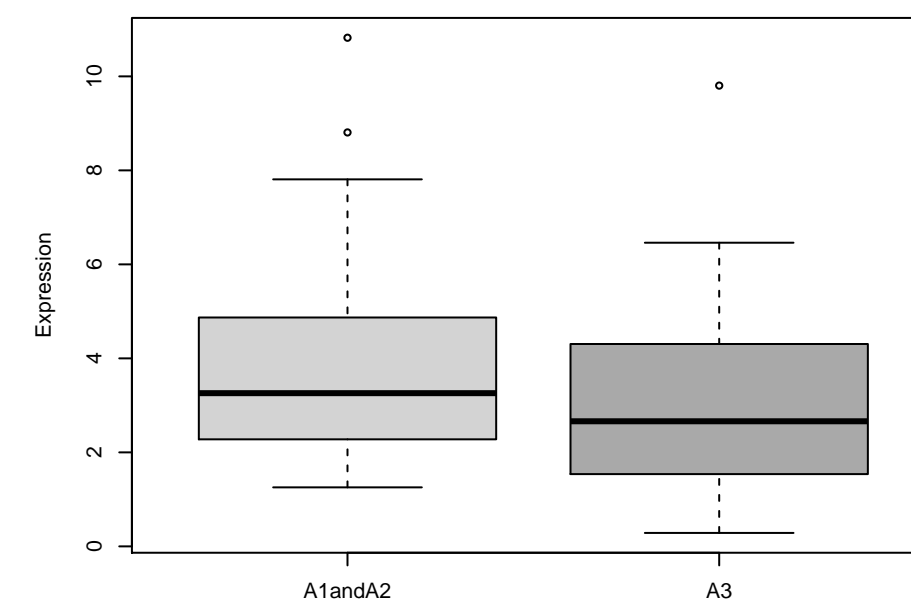**SERPINA1 EAIPMSIPPEVKFNKPFV**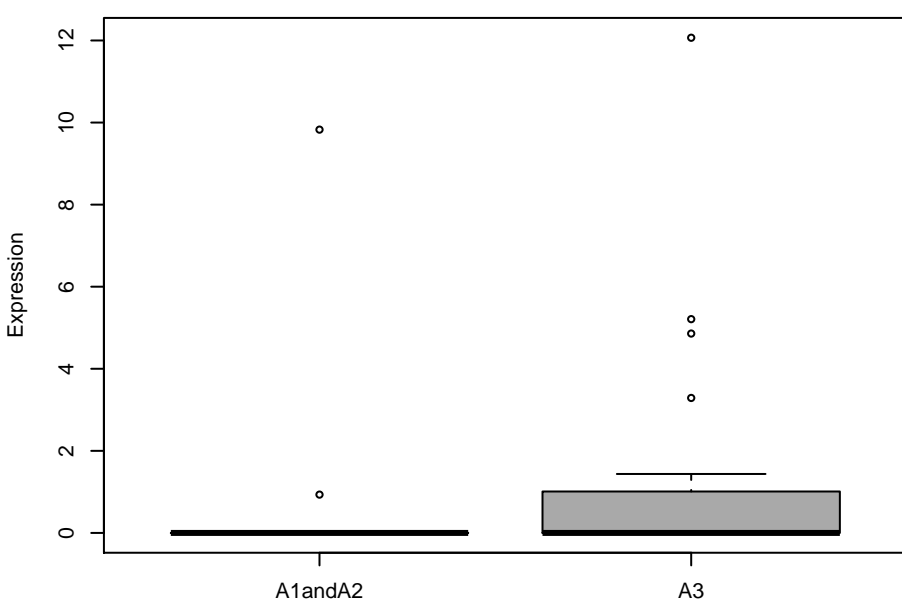**LMAN2 DTYPNDETTERRVFPYIS**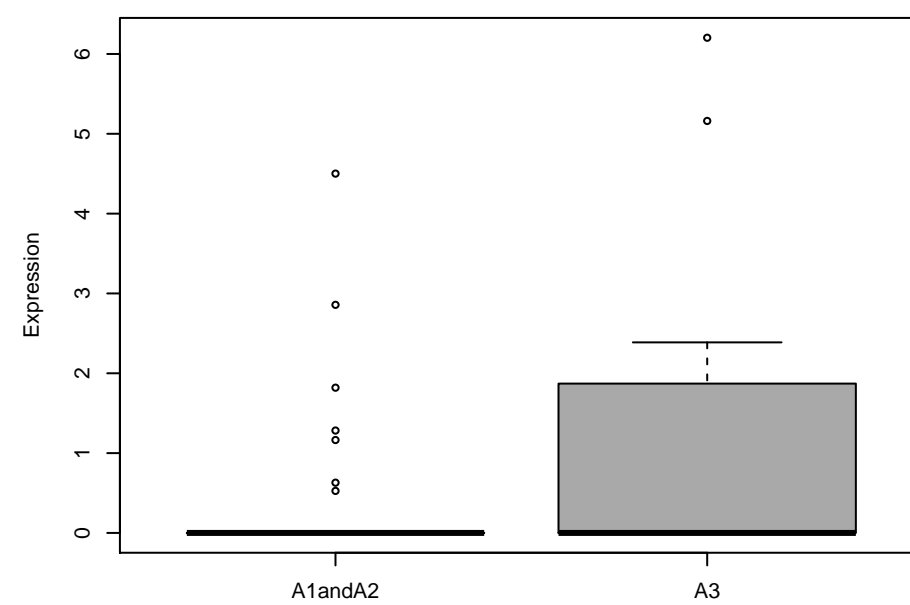**COL1A1 DGQPGAKGEPGDAGAKGDAGPPGP**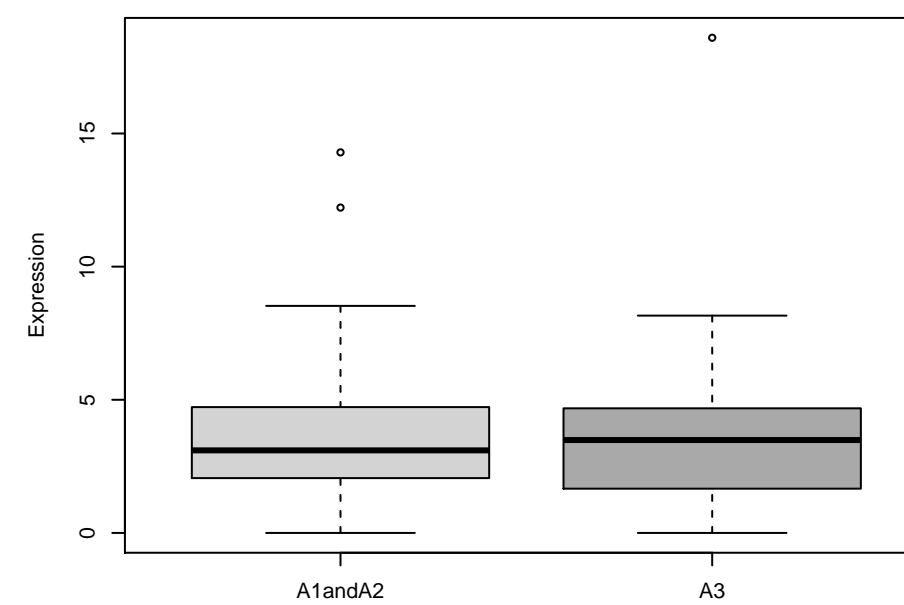**SERPINA1 LNQPDSQLQLTTGNGLF**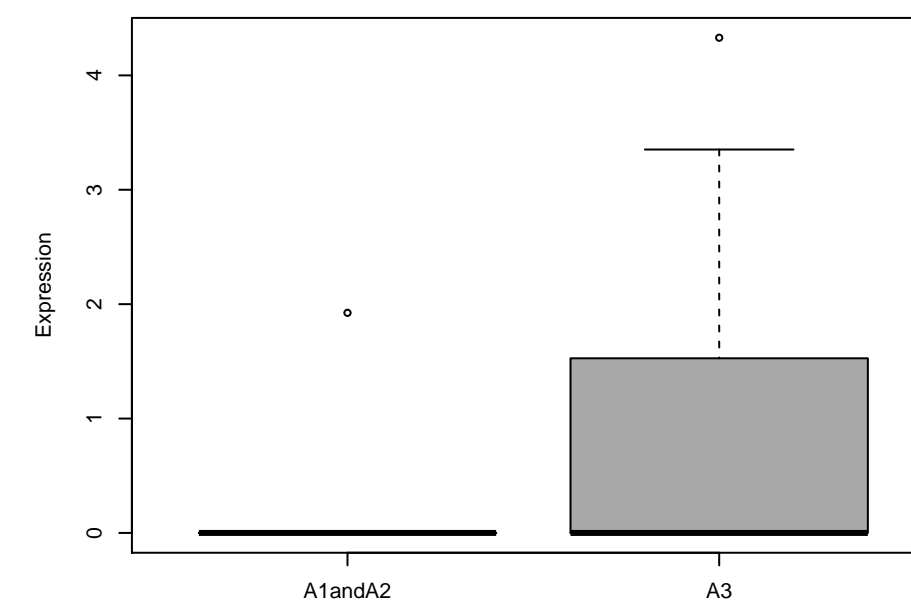**COL1A1 EGSPGRDGSFGAKGDRGETGP**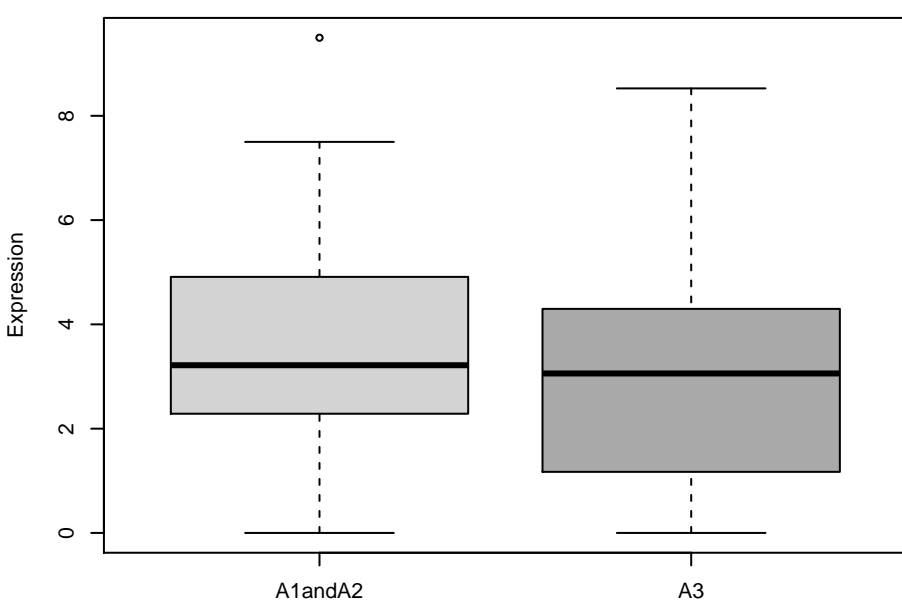**SERPING1 ELTETGVEAAAASISVAR**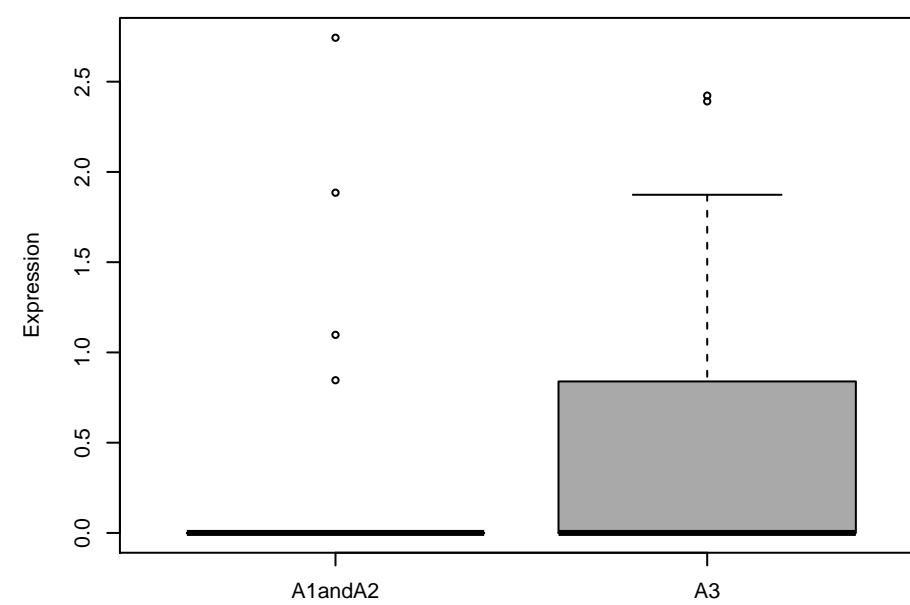**COL1A1 NGDDGEAGKPRPGERGPPGP**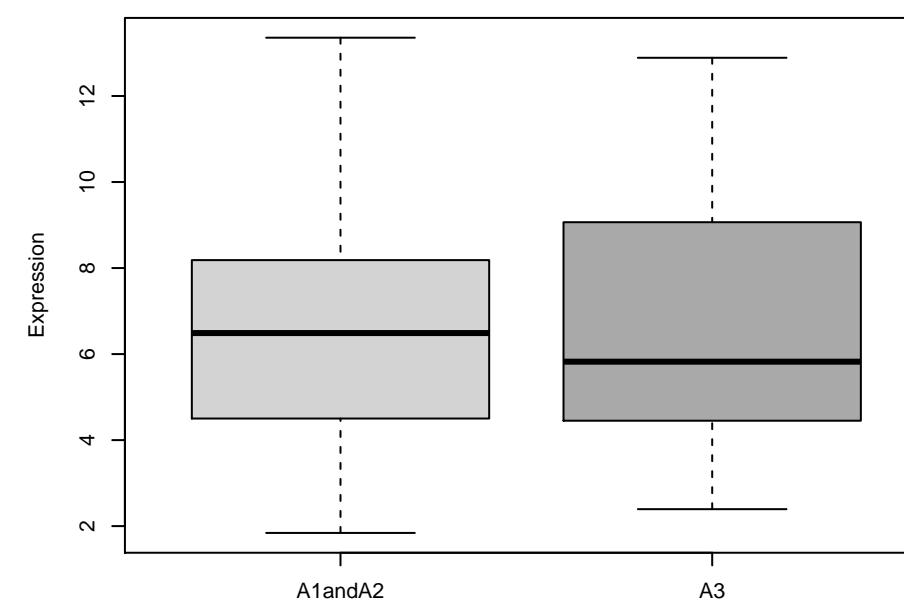**COL1A2 SPGNIGPAGKEGPVGLPG**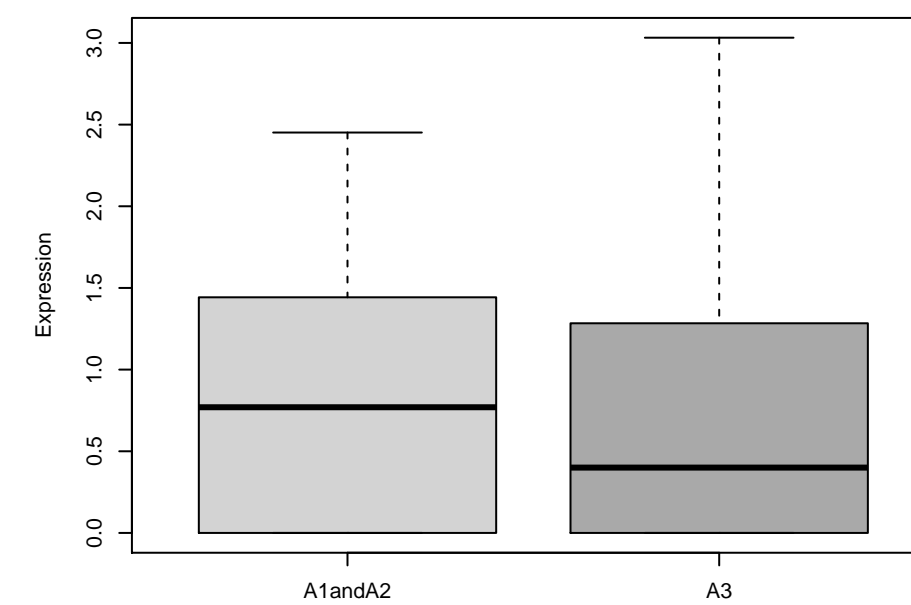**COL1A1 NDGAKGDAGAPGAGSQGAPG**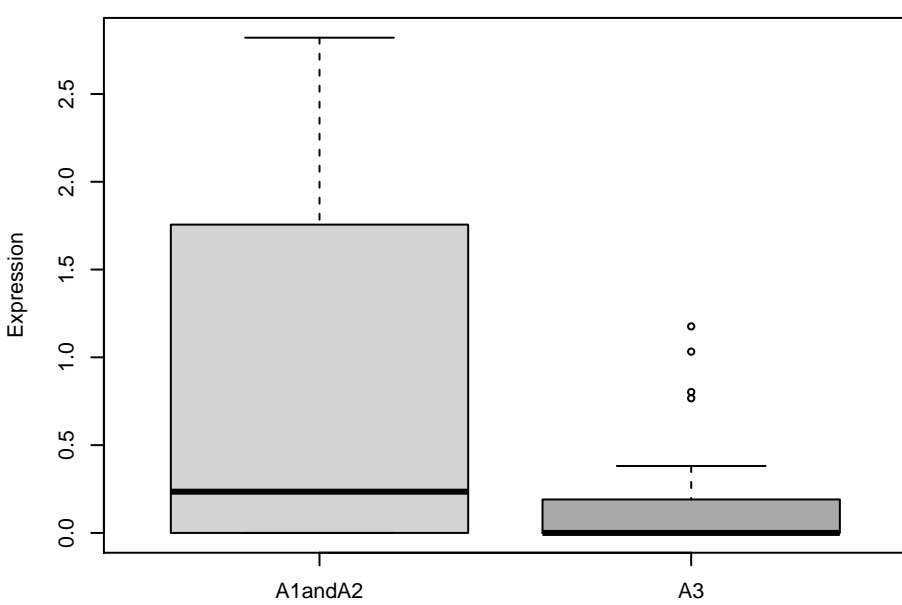**COL1A1 AGPPGAPGAPGAPGVGAPGKSGDRGETGP**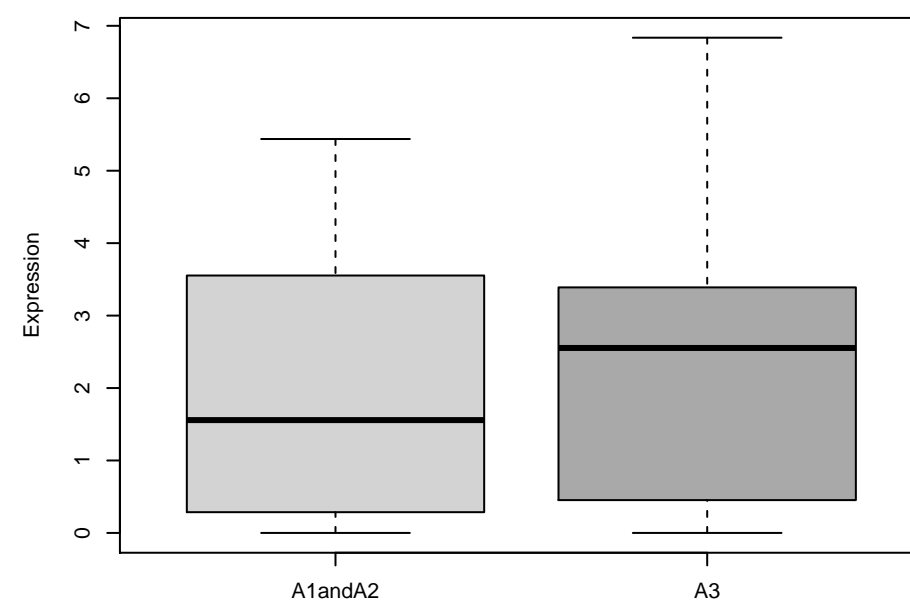**UMOD VIDQSRVNLNGPI**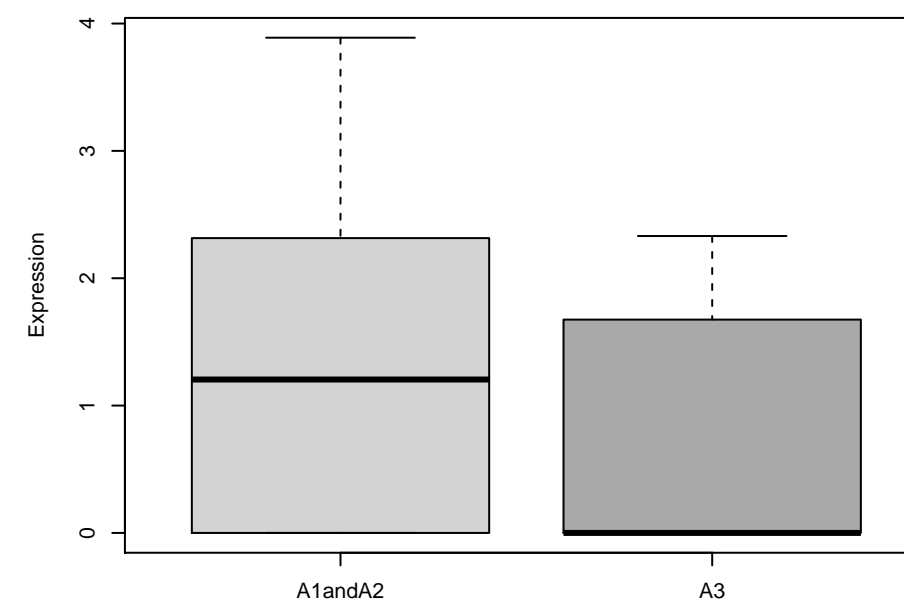**SERPINA1 LRTLNPDSQLQLTTGNGL**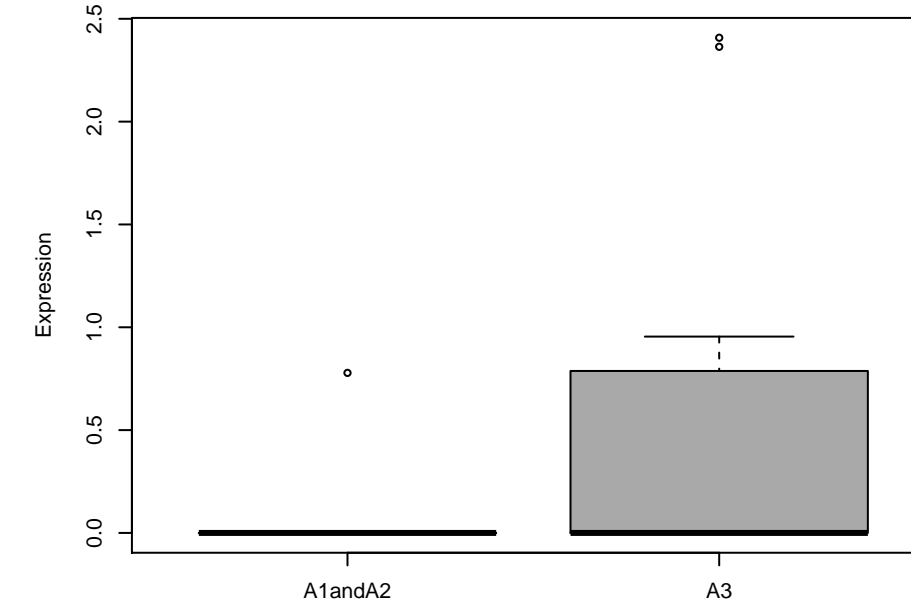

**A1BG LREGETKAVKTVRTPGAAANLEL**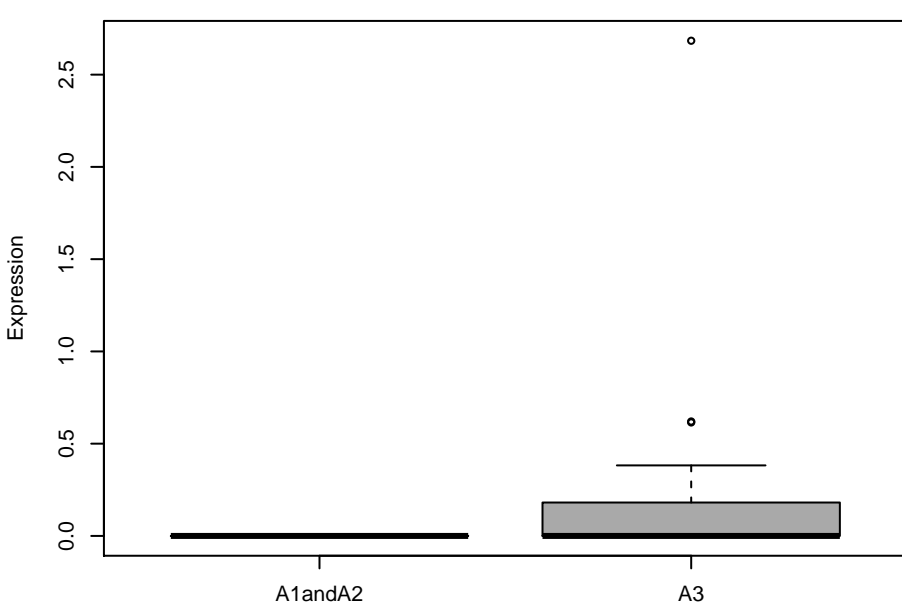**FGB EEAPSLRPAPPISGGG**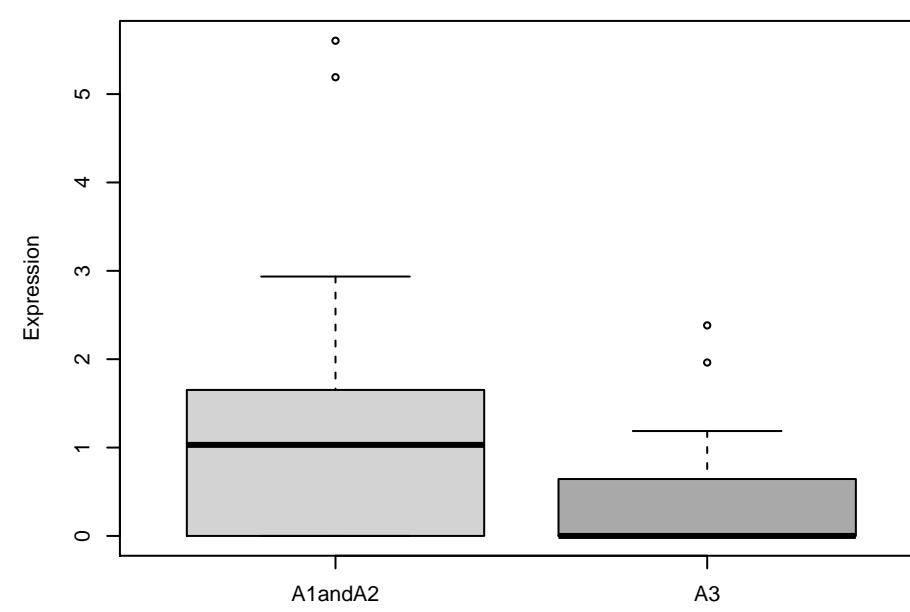**COL1A1 NSGEPGAPGSKGDTGAKGEPGP**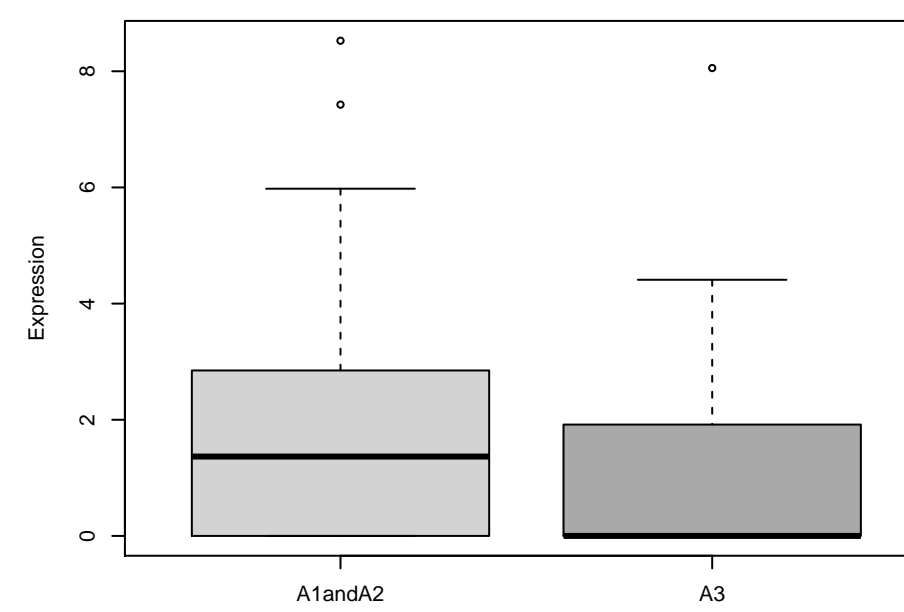**COL1A1 GPPGEAGKPGEGVPGDLGAPGP**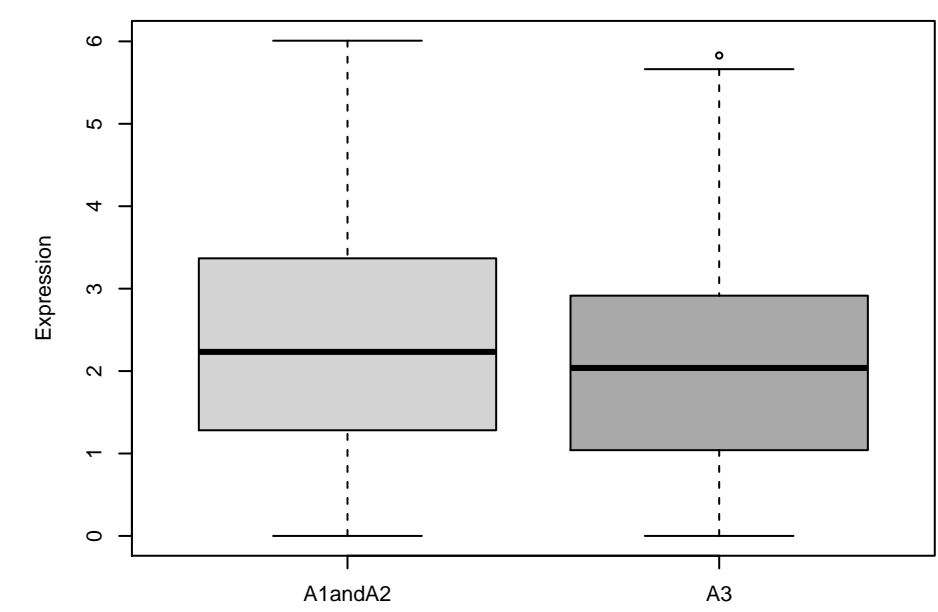**SERPINA1 SNGADLSGVTEEAPLKL**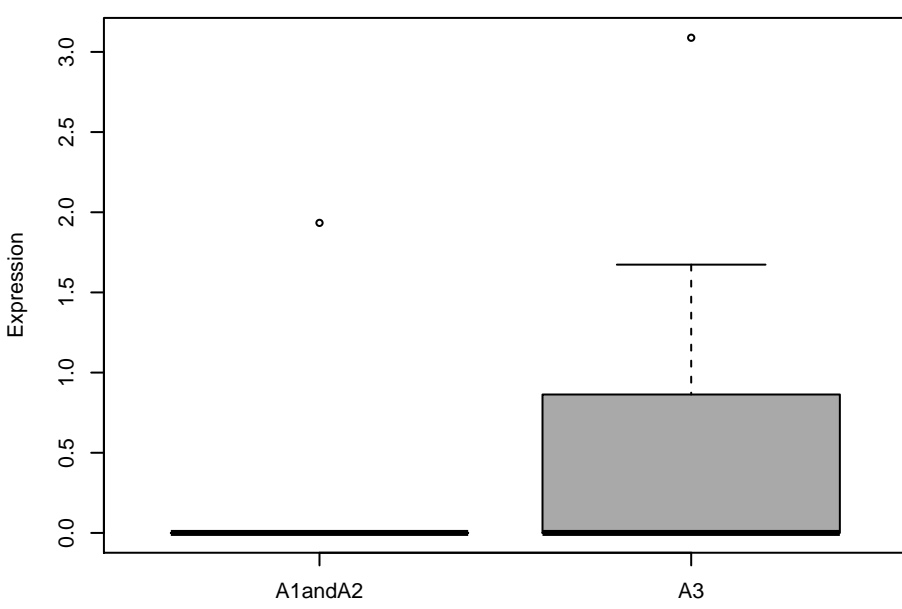**FGA DEAGSEADHEGTHSTKRG**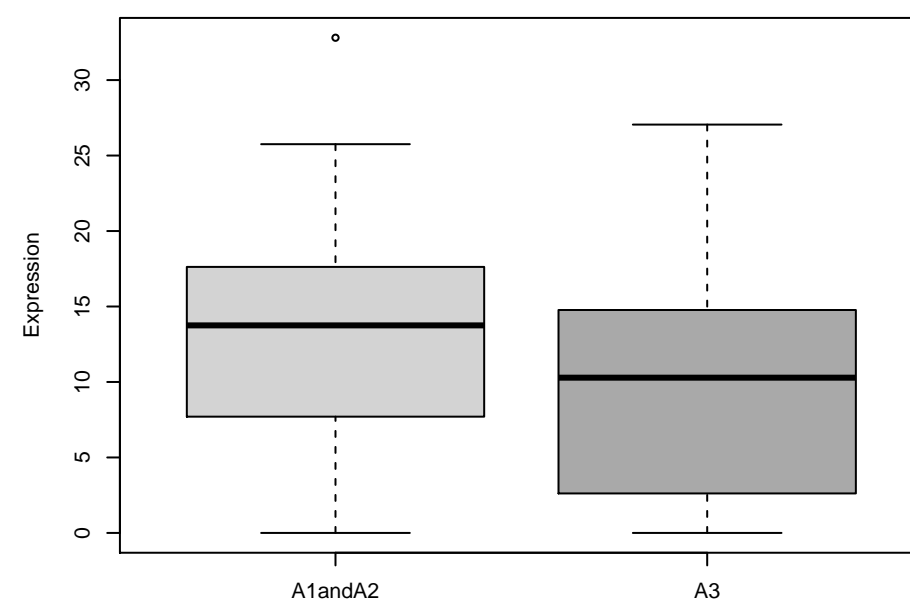**INS EAEDLQVQVELGGGPGAGSLQPLALEGS**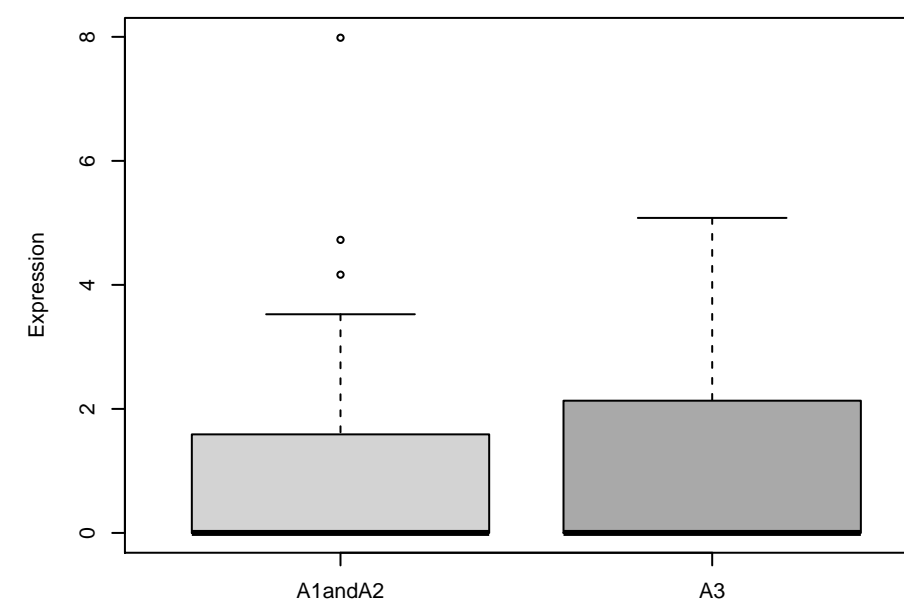**COL1A2 RTGEVAVGPPGFAGEKGPSGEAGTAGPPGTPGP**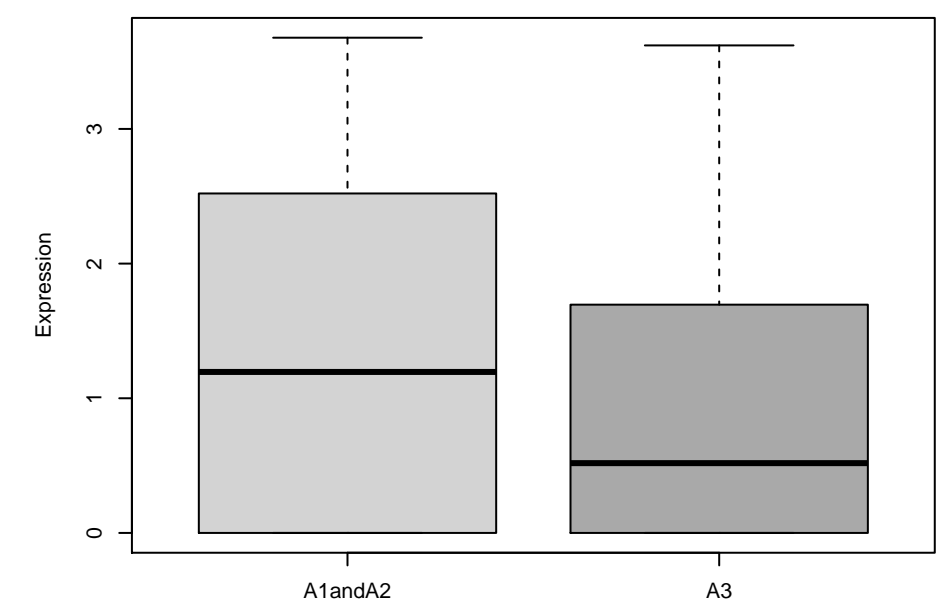**COL1A1 PPGEAGKPGEGVPGDLG**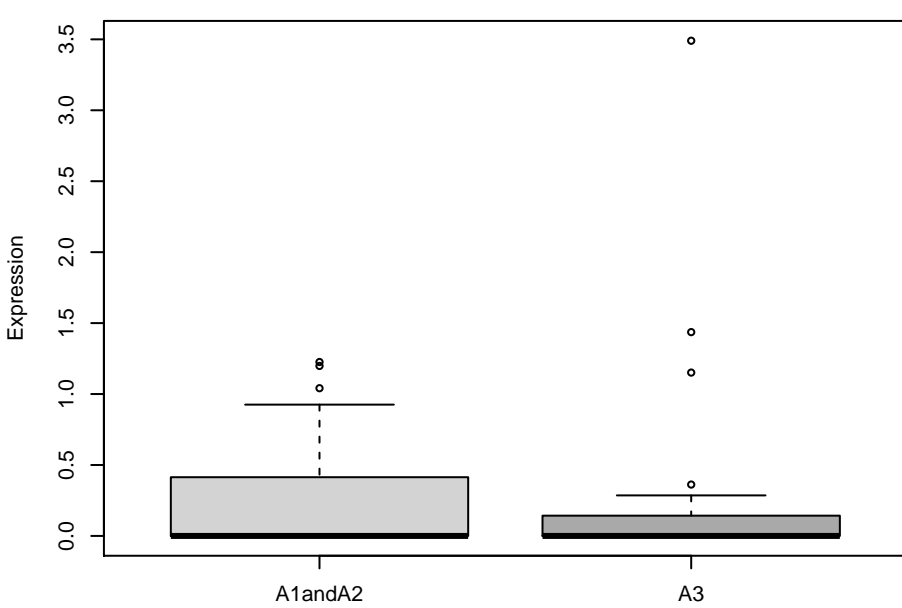**SERPINA1 LMIEQNTKSPLFMGKVVNPTQK**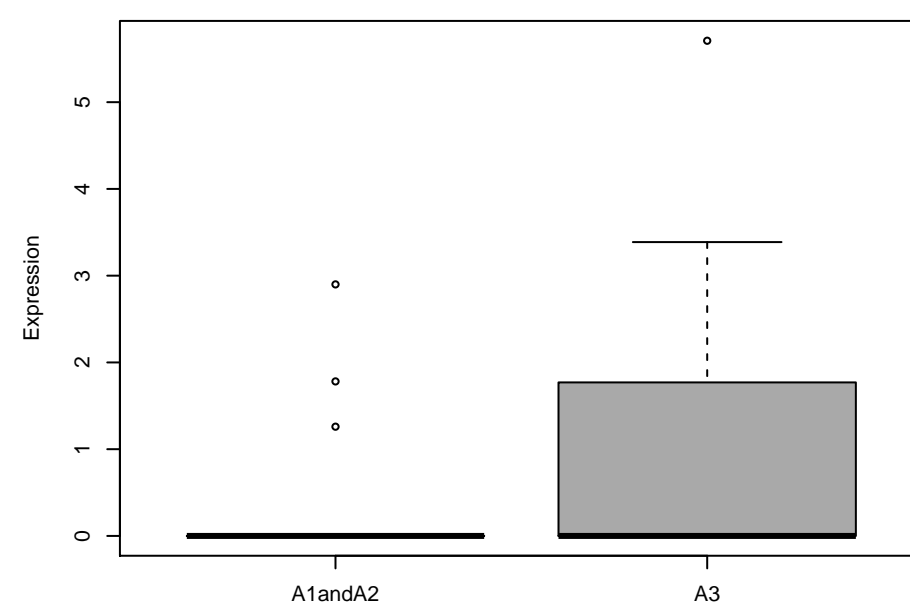**COL1A1 ADGQPGAKGEPGDAGAKGDAGPPGP**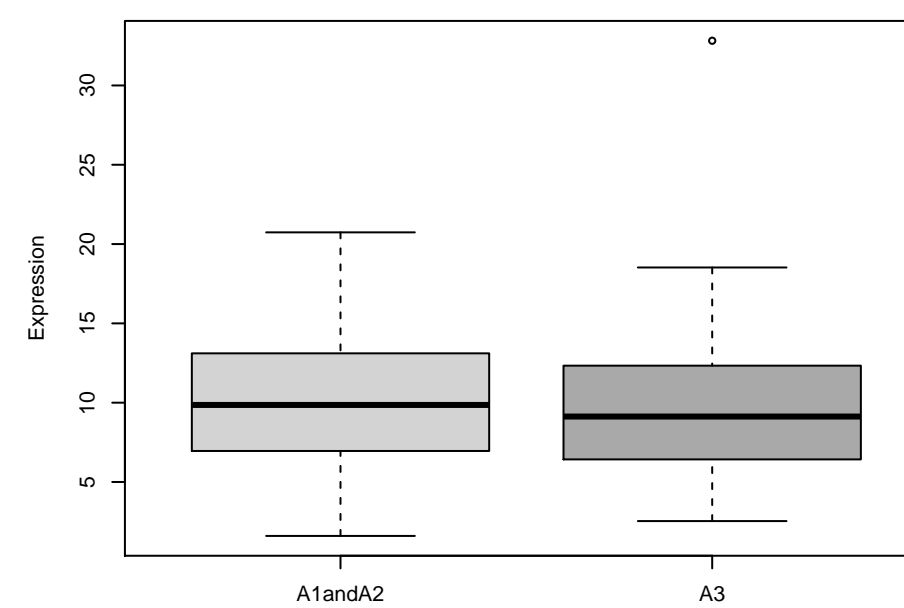**UMOD IDQSRVNLNLGPITR**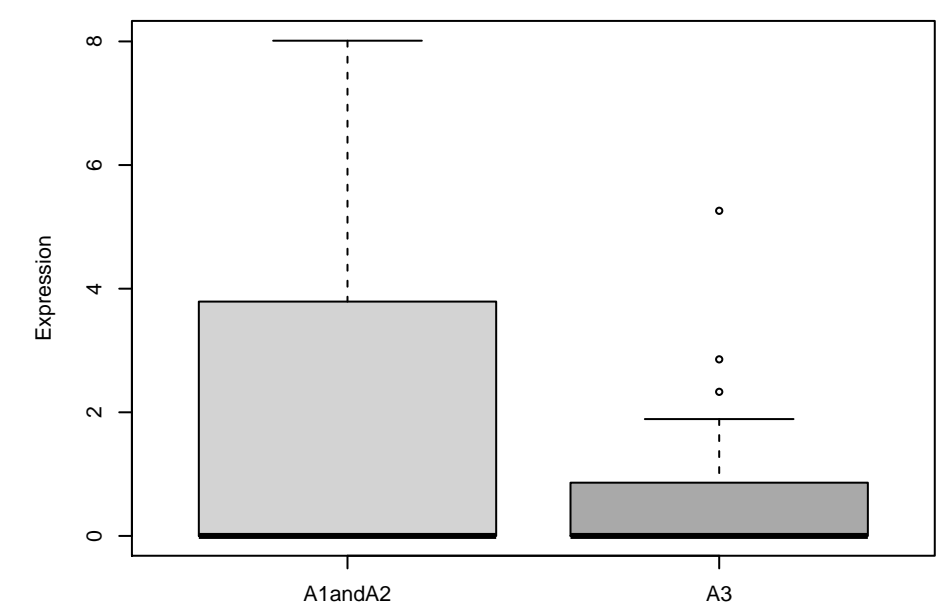**UMOD SGVIDQSRVNLNLGPITR**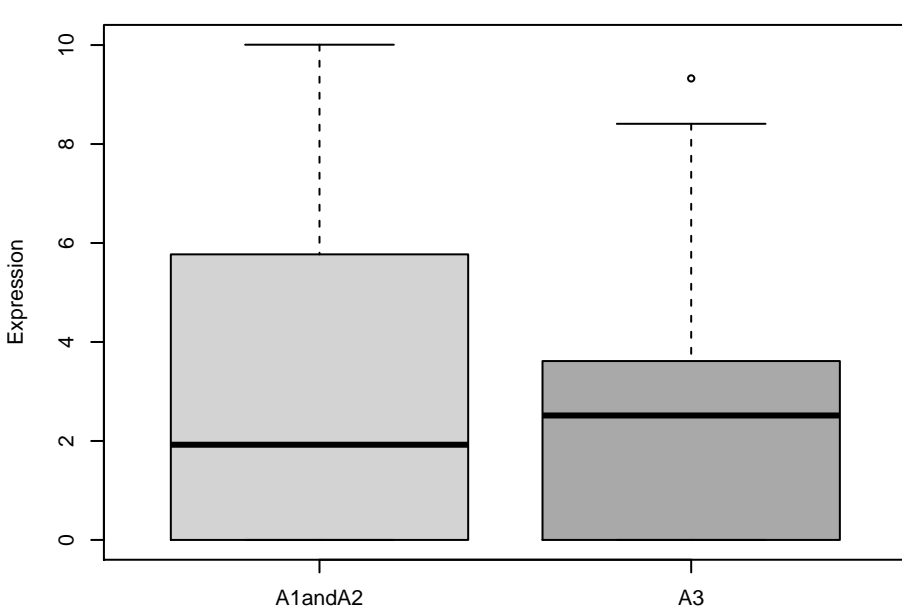**LMAN2 LDTPNDETTERRVFPY**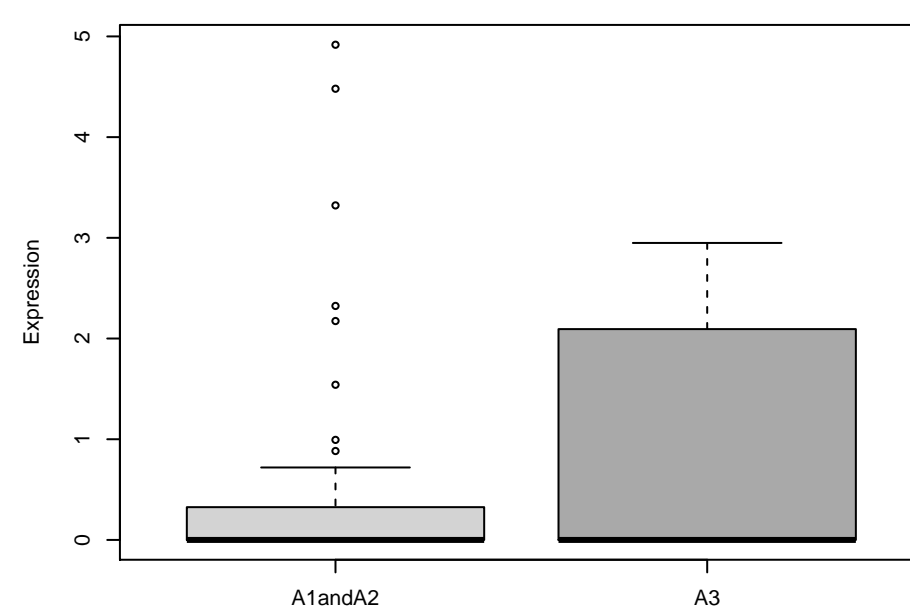**UMOD SGVIDQSRVNLNLGPI**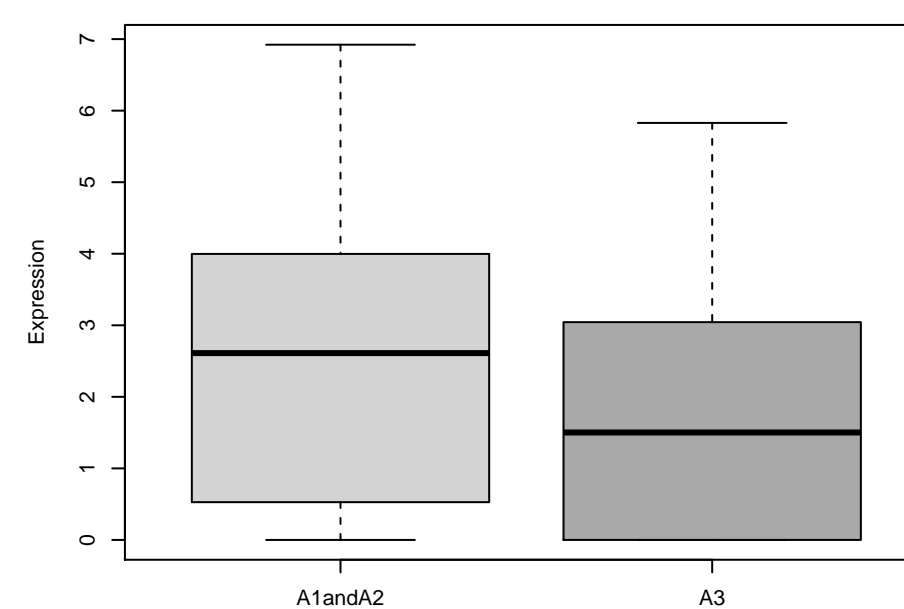**LMAN2 FGASAGTGLSDNHDI SMK**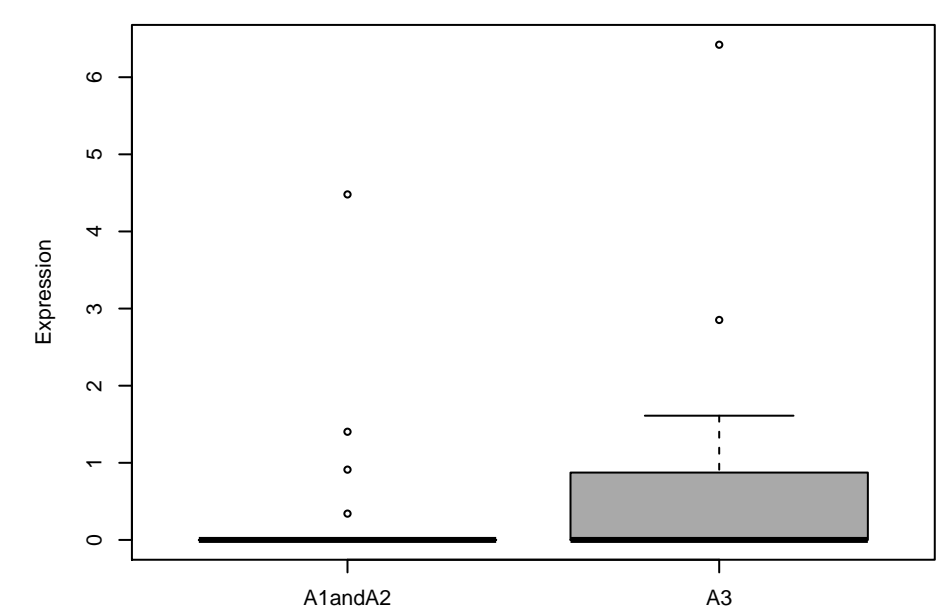**CDH1 KVTADAPNTPAWEAVY**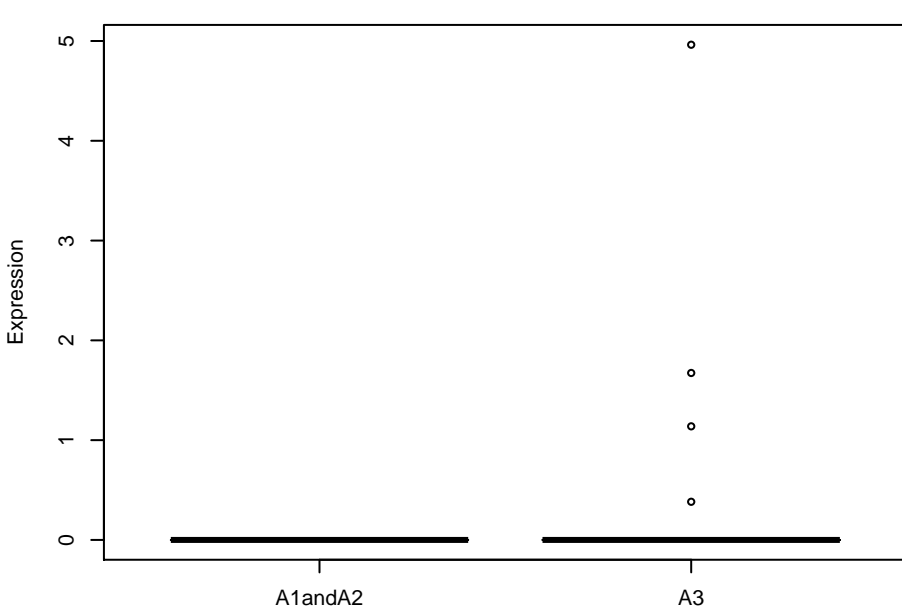**UMOD SVIDQSRVNLNLGPI**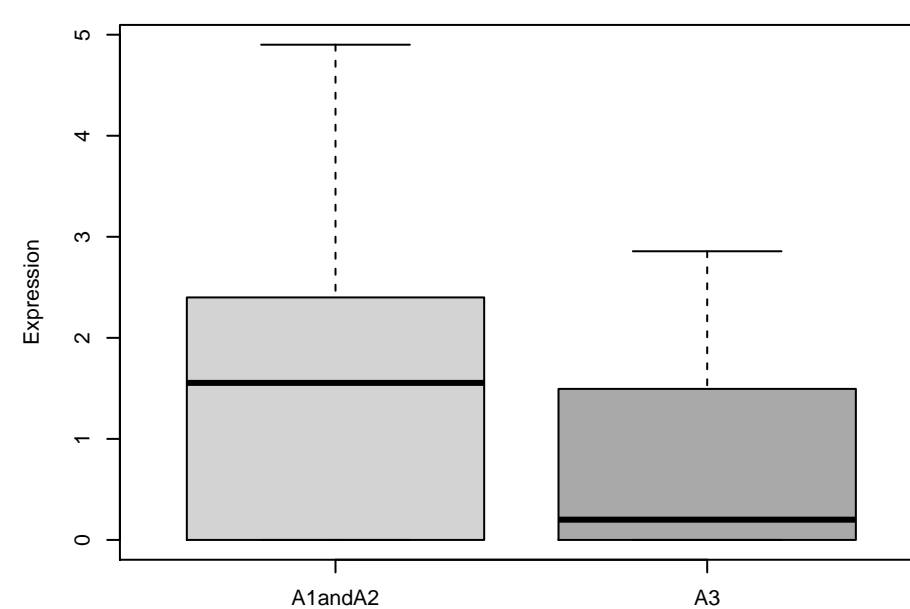**CLU FSDPITVTPVEV**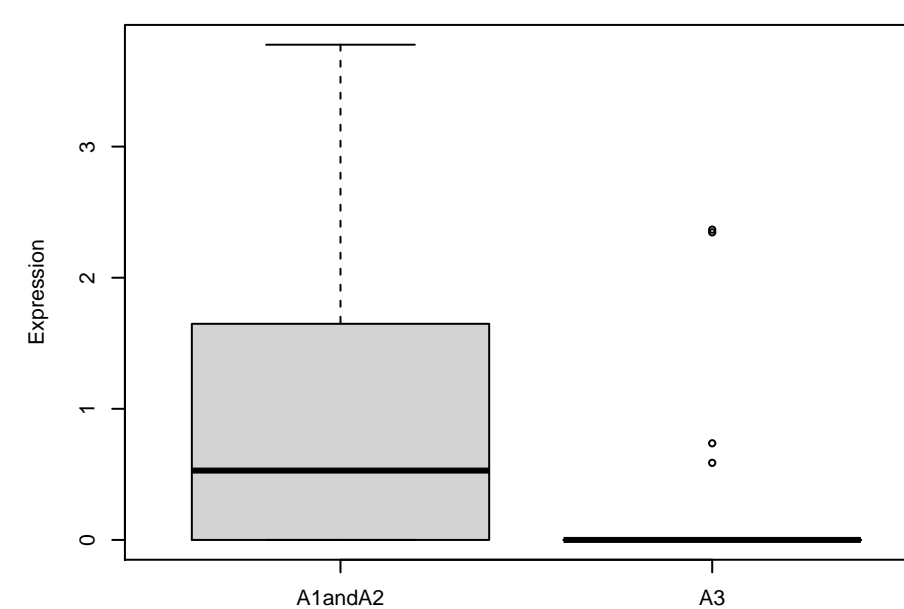**INS EAEDLQVQVELGGGPGAGSLQ**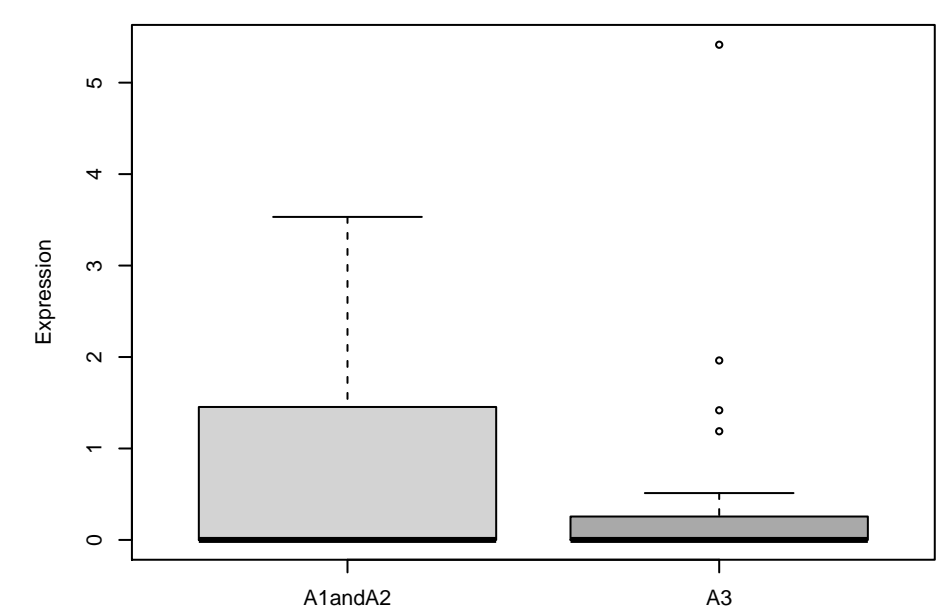

Supplement: 41598_2020_58067_MOESM3_ESM.pdf [file 41598_2020_58067_MOESM3_ESM.pdf]
