# Supplementary material for: Urinary peptidomics and bioinformatics for the detection of diabetic kidney disease
Source: PubMed Central journal article supplement (PMC6985249; doi:10.1038/s41598-020-58067-7), 2020-01-27

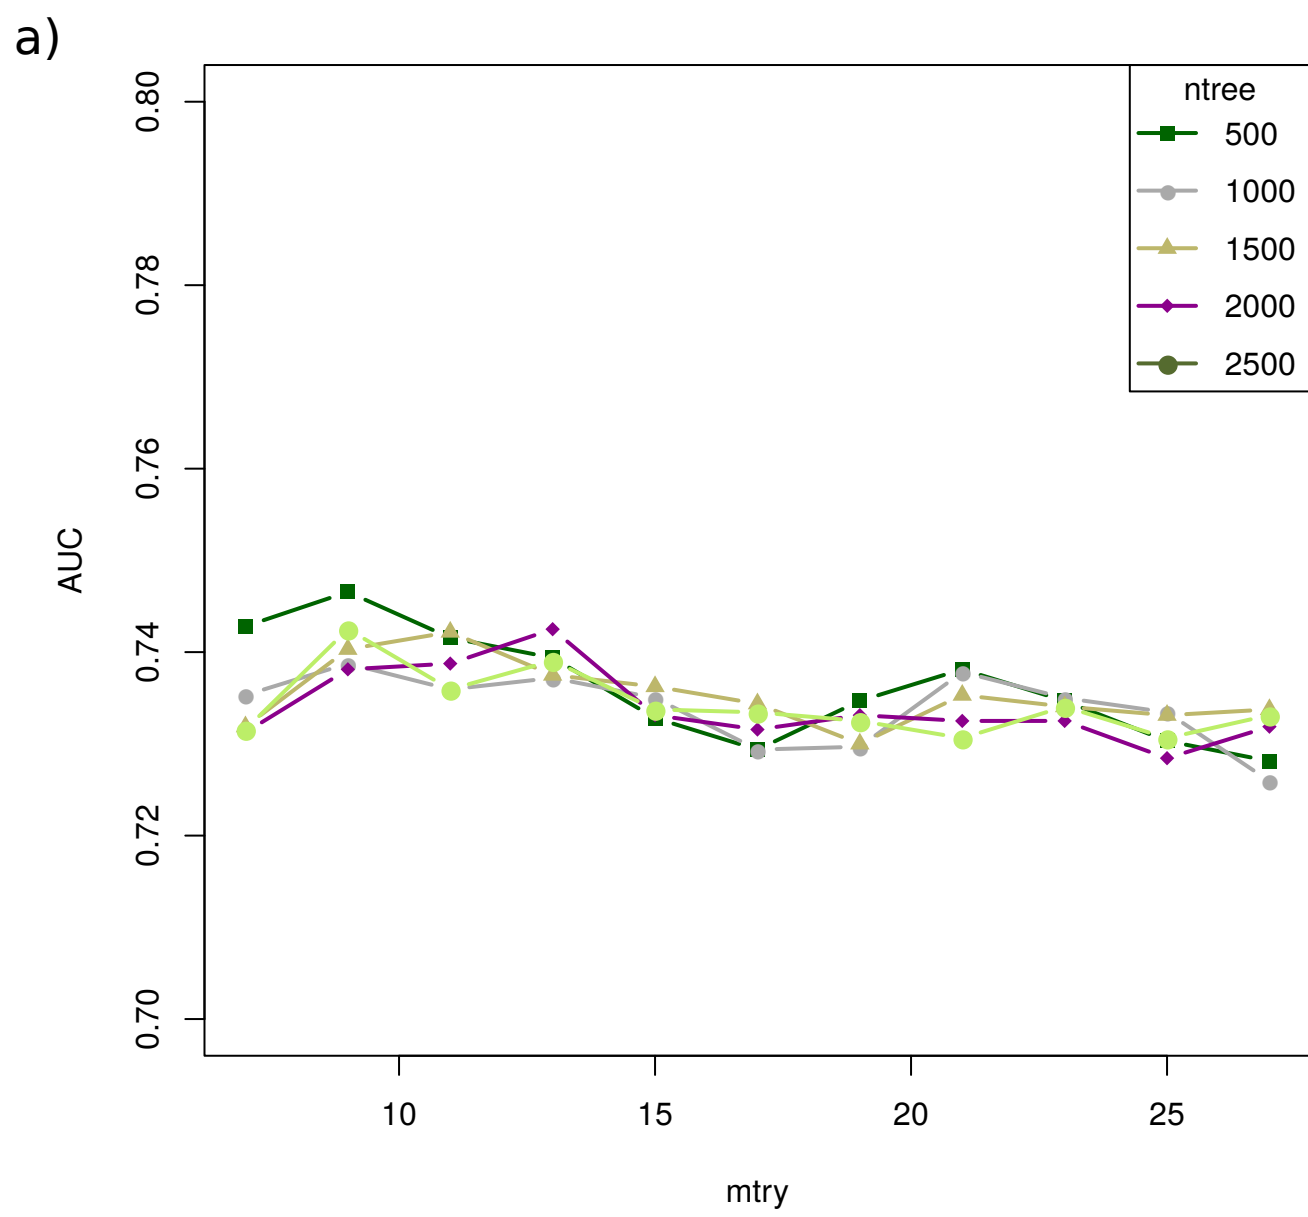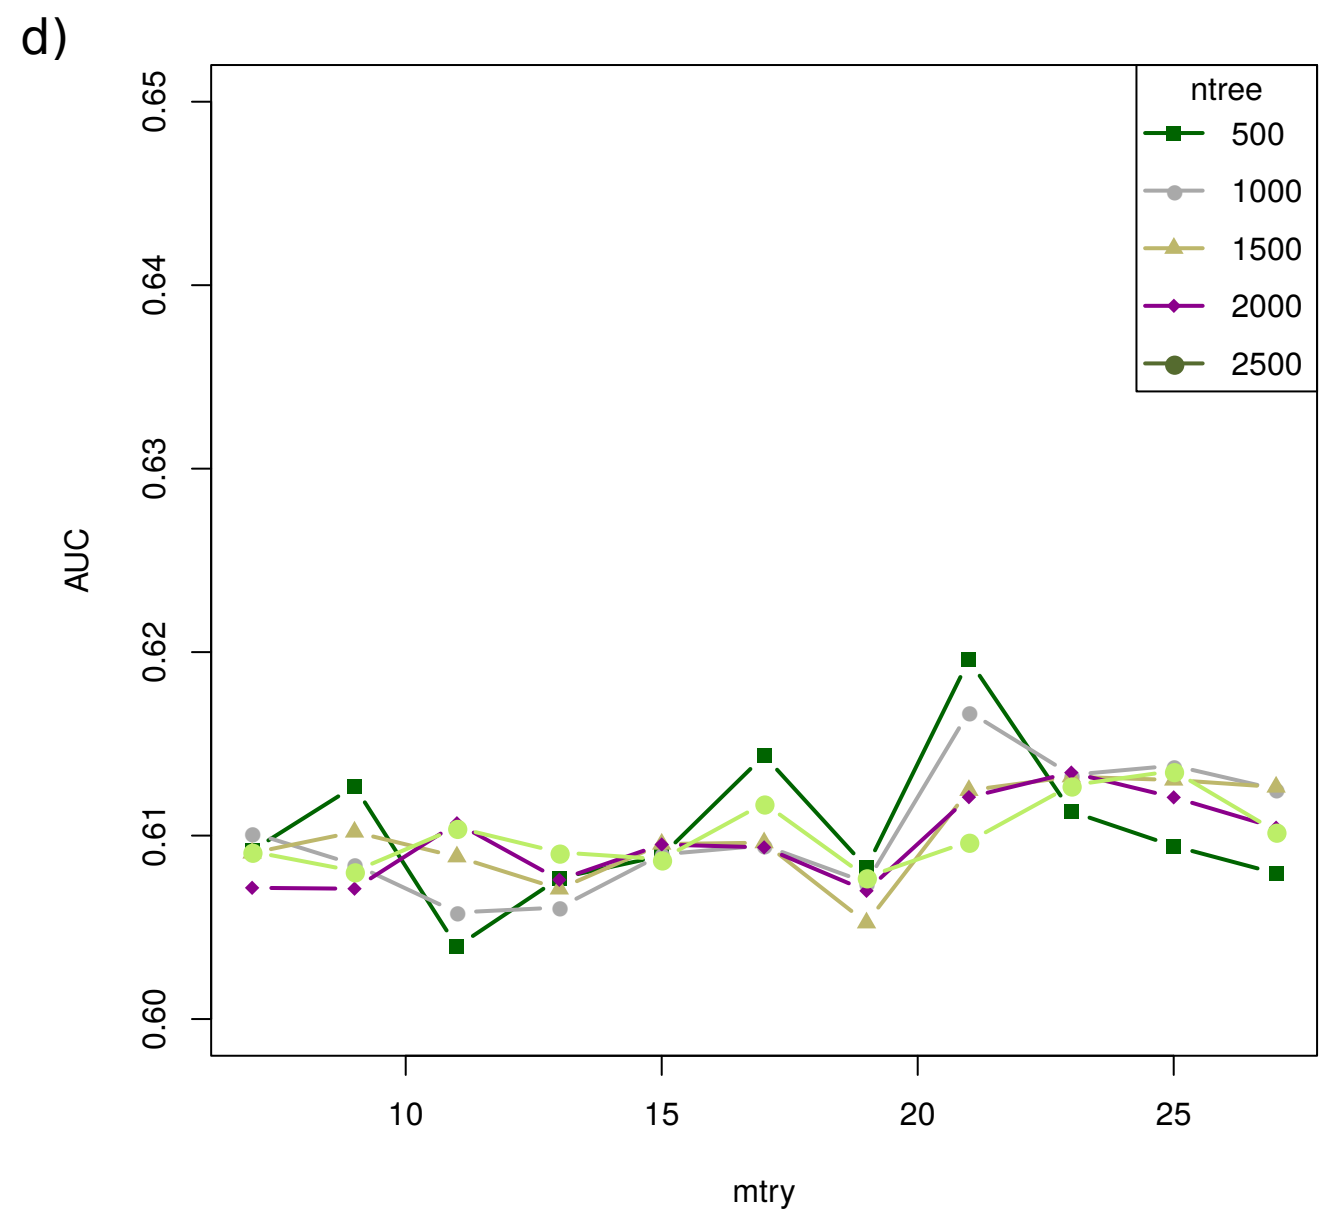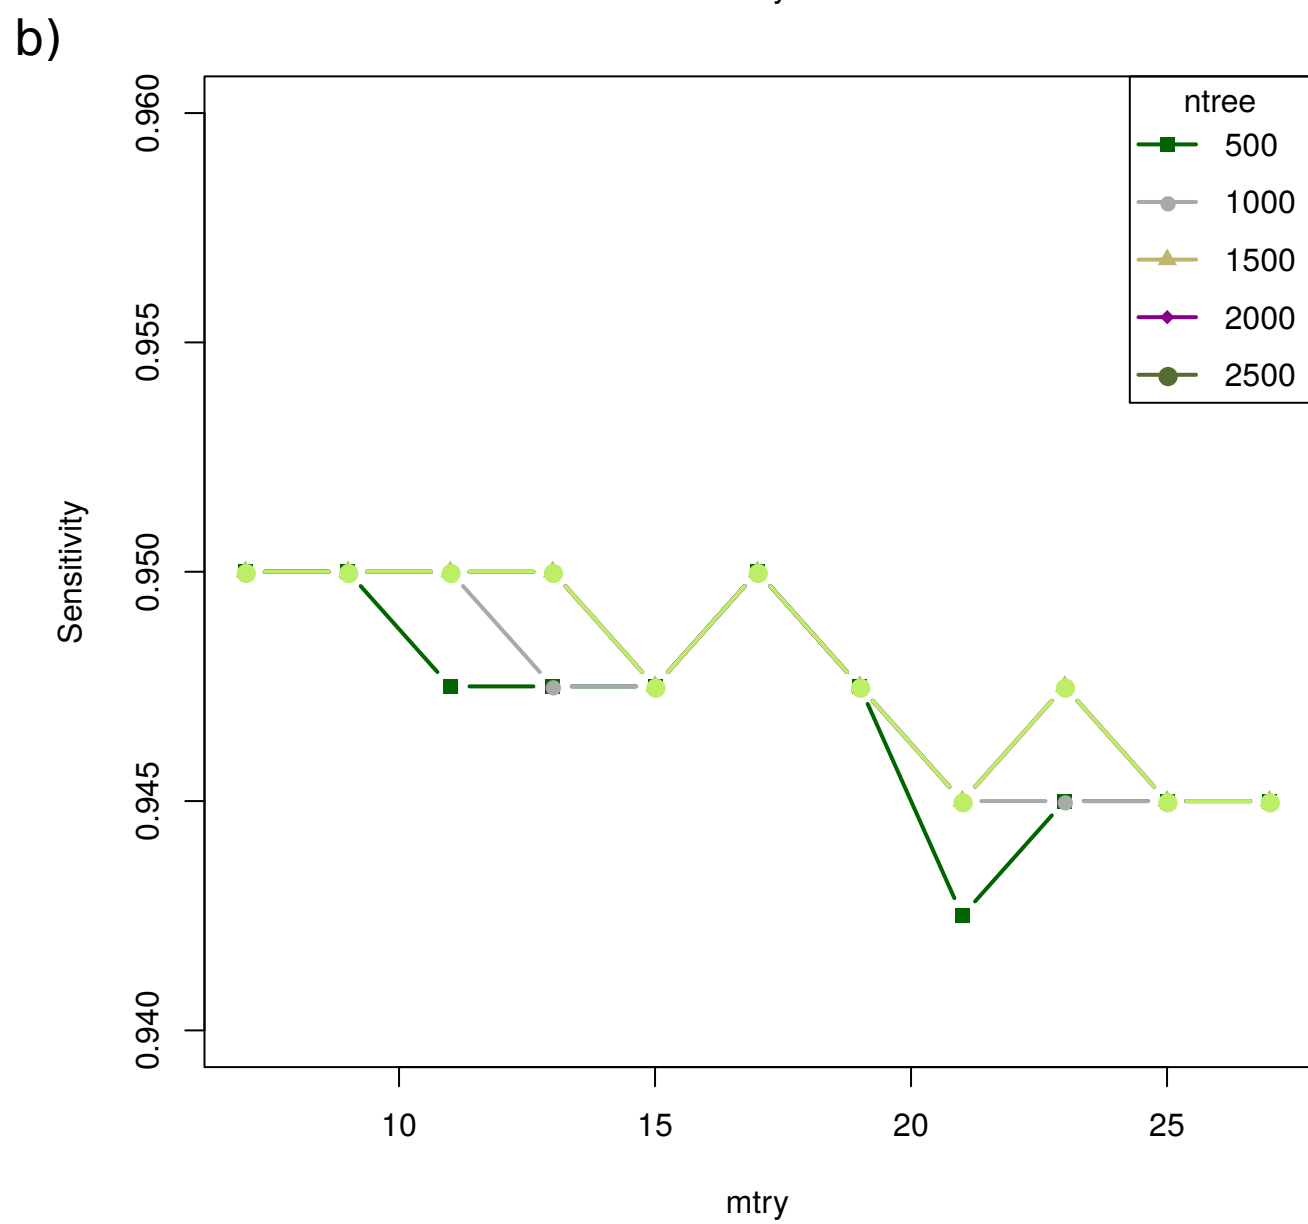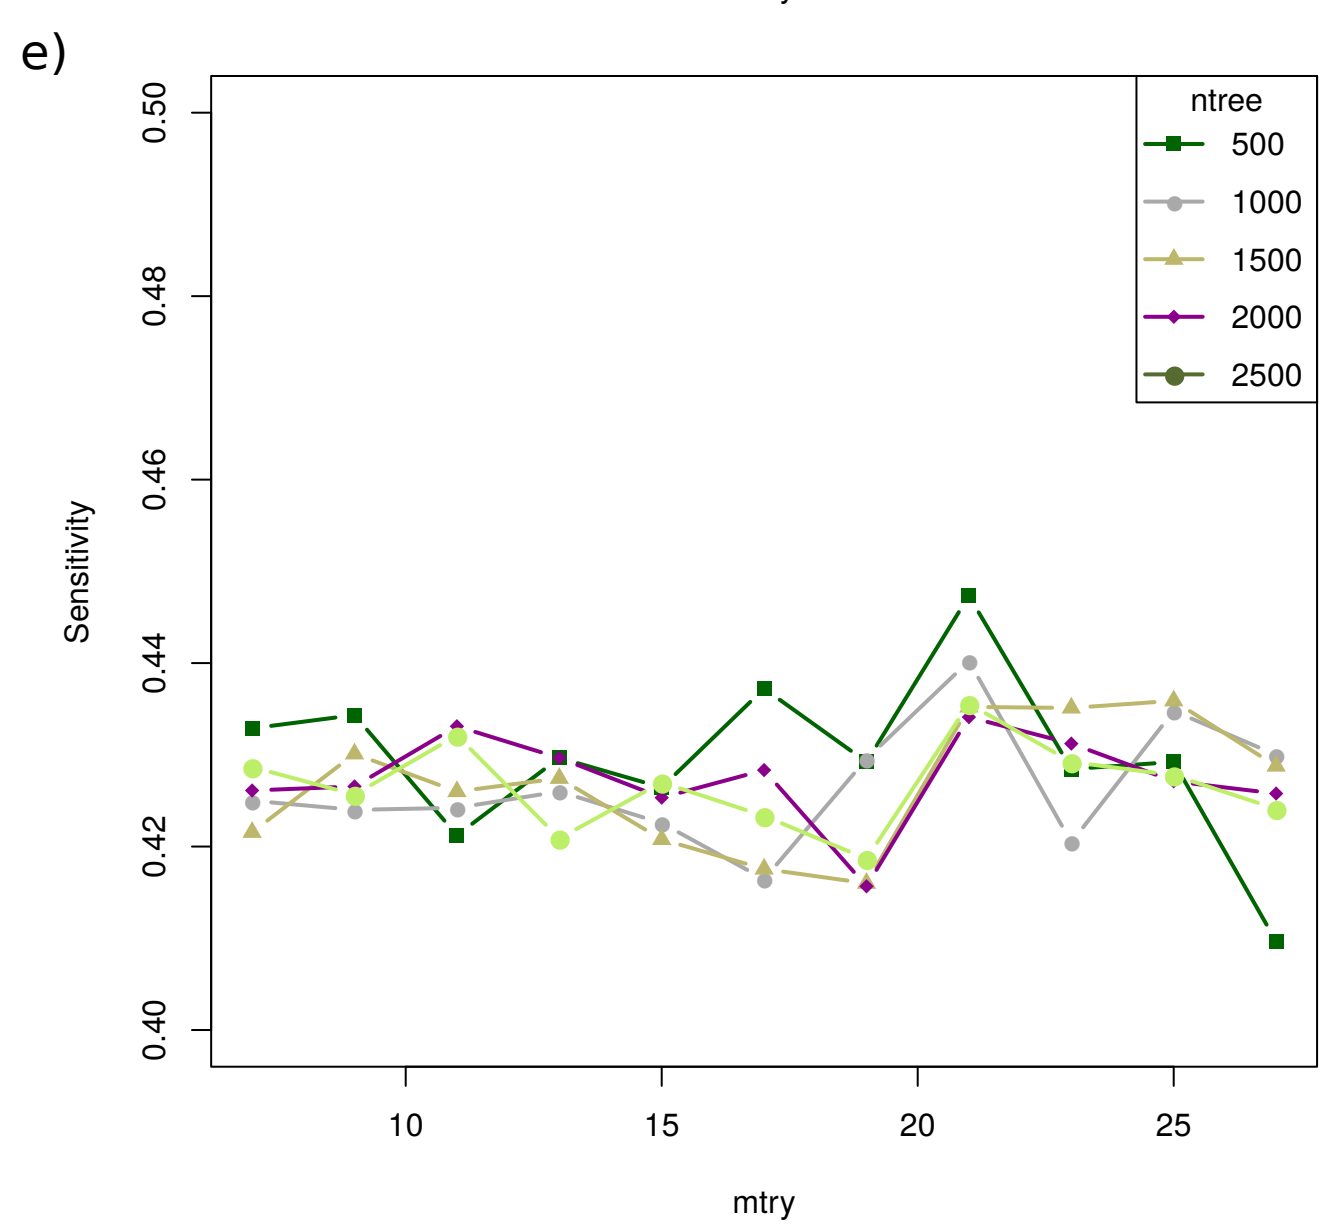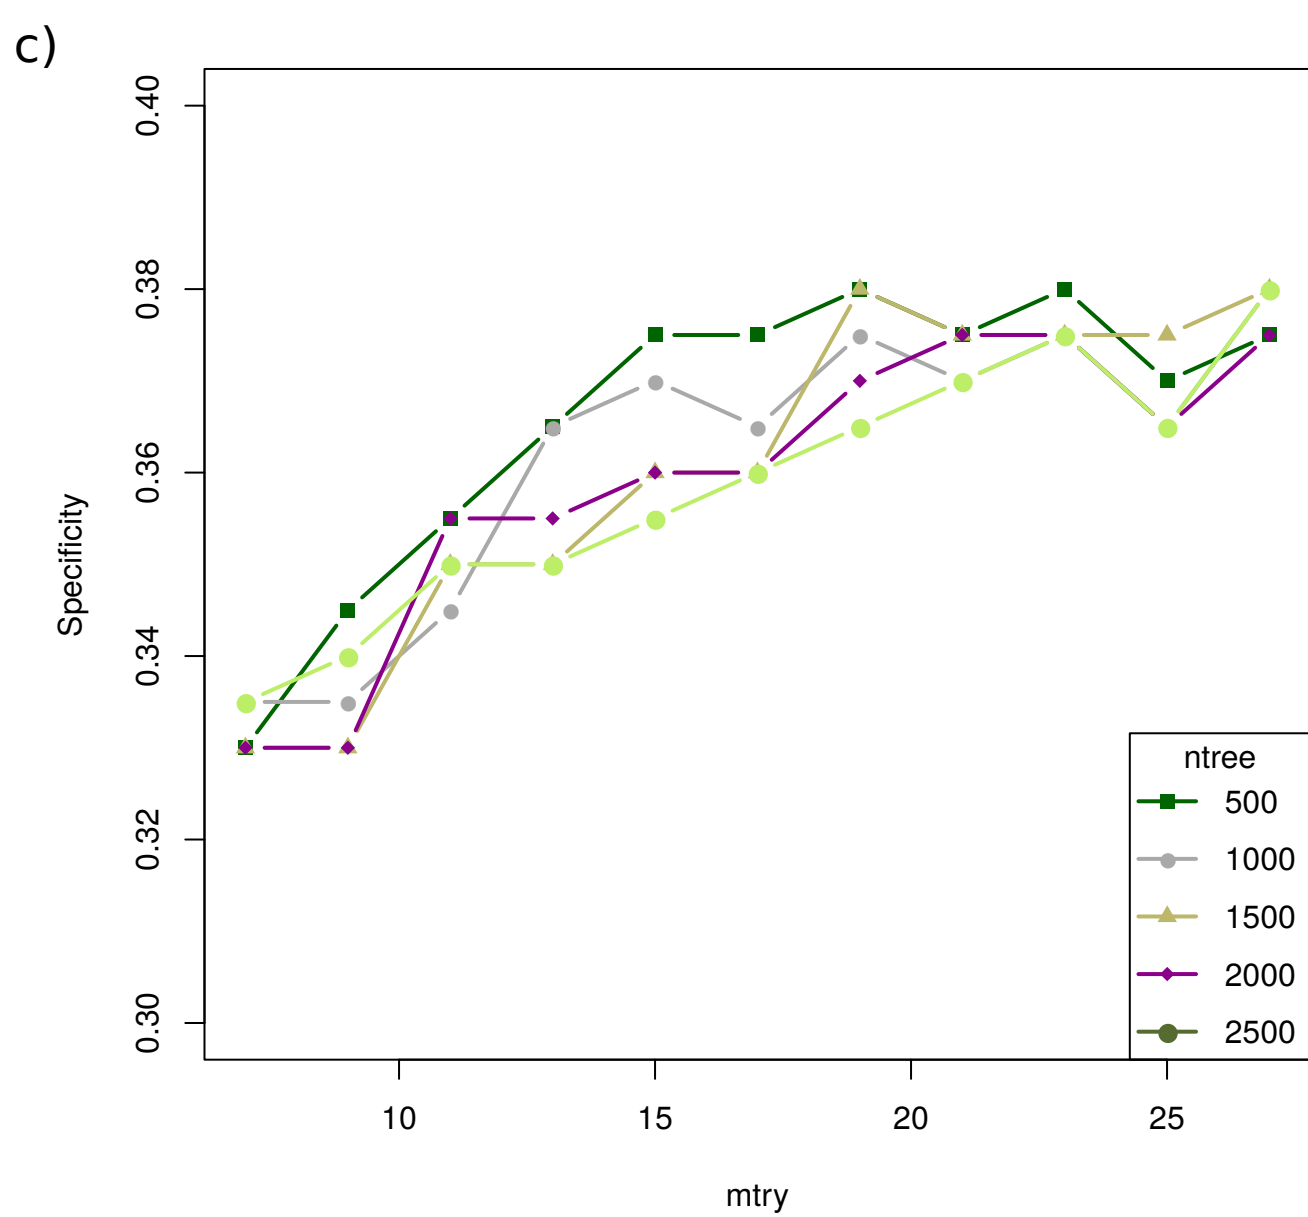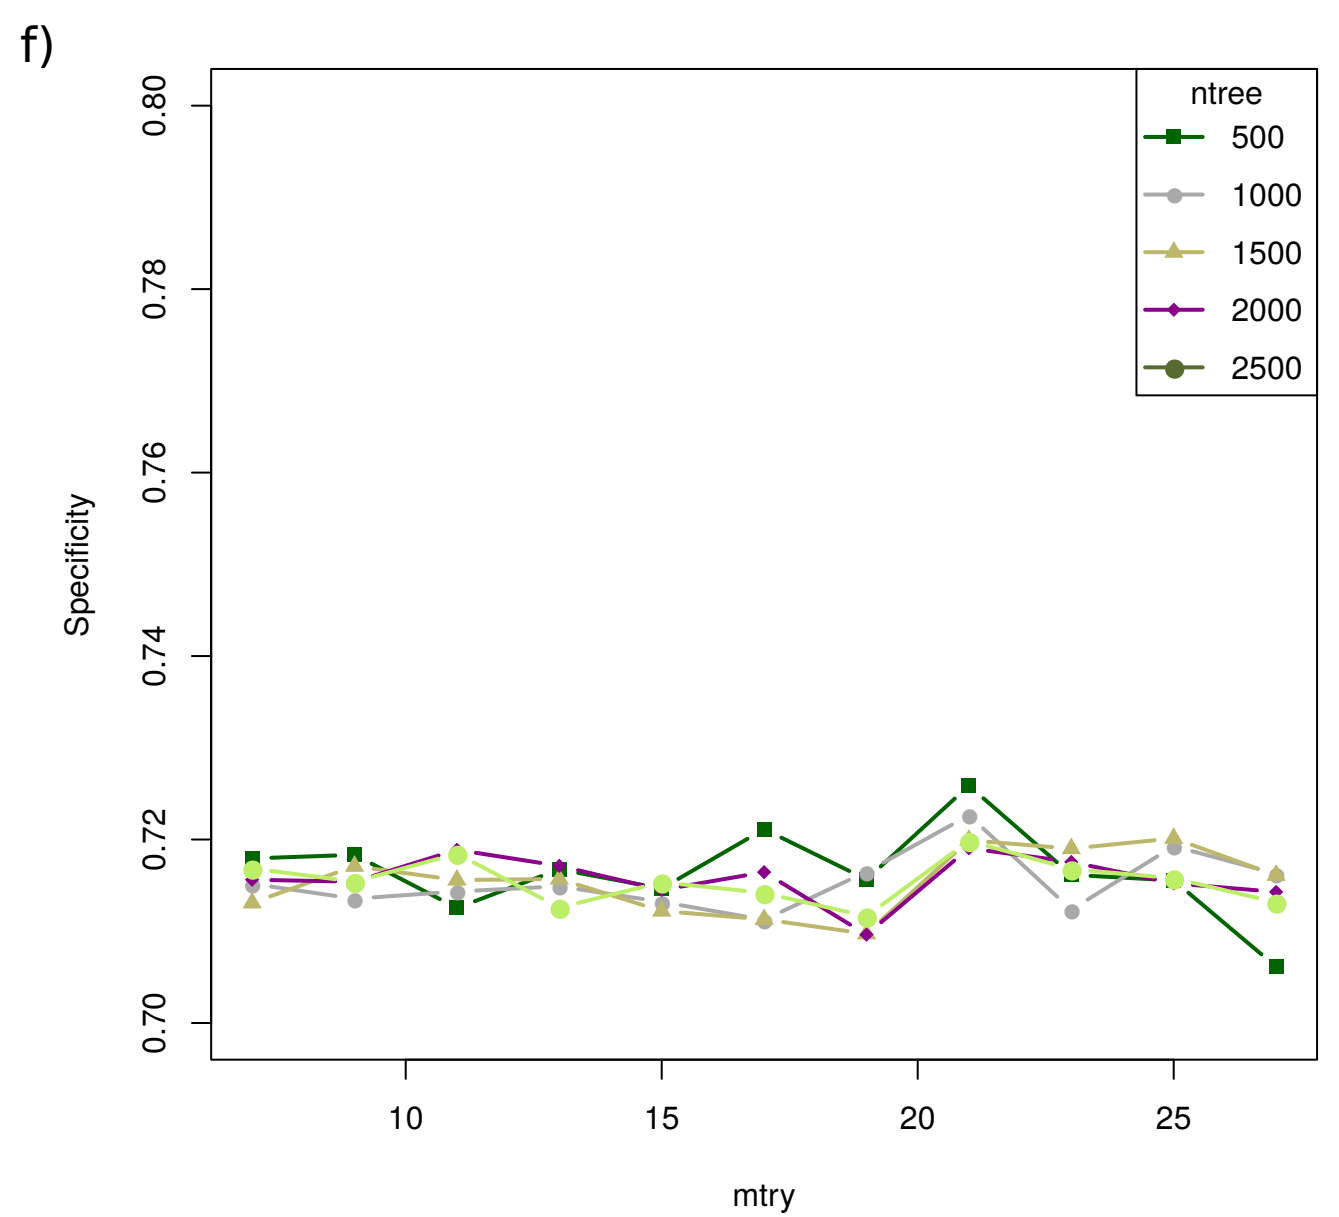

Supplement: 41598_2020_58067_MOESM2_ESM.pdf [file 41598_2020_58067_MOESM2_ESM.pdf]
